# Supplementary material for: Assemblathon 2: evaluating de novo methods of genome assembly in three vertebrate species
Source: PubMed Central journal article supplement (PMC3844414; doi:10.1186/2047-217x-2-10), 2013-07-22

NODE\_1\_length\_5776\_cov\_626.185608

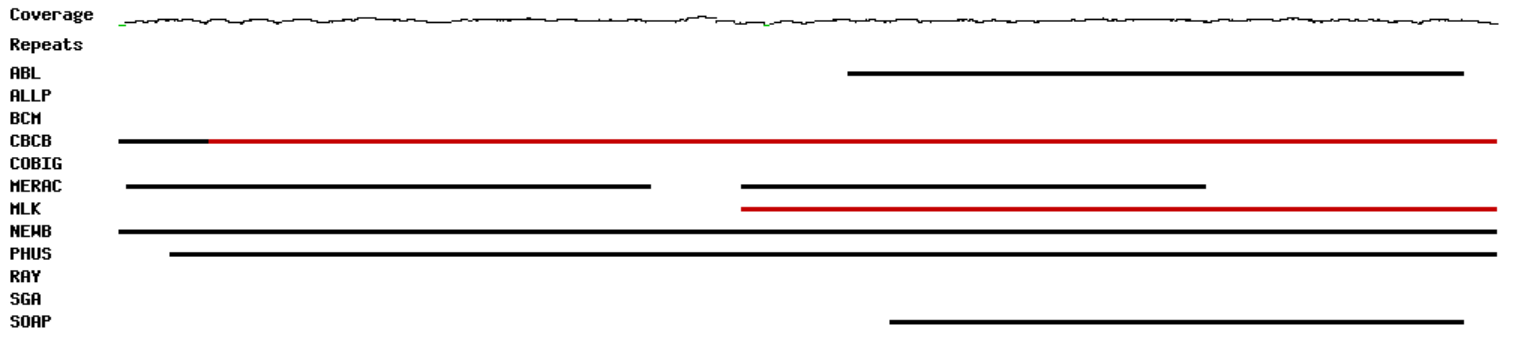

NODE\_1\_length\_19121\_cov\_920.435425

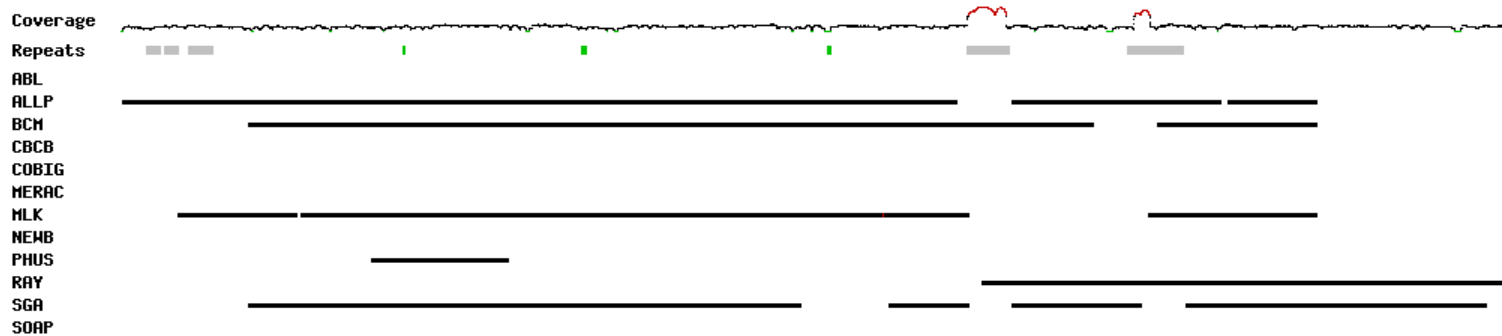

NODE\_1\_length\_31165\_cov\_824,820679

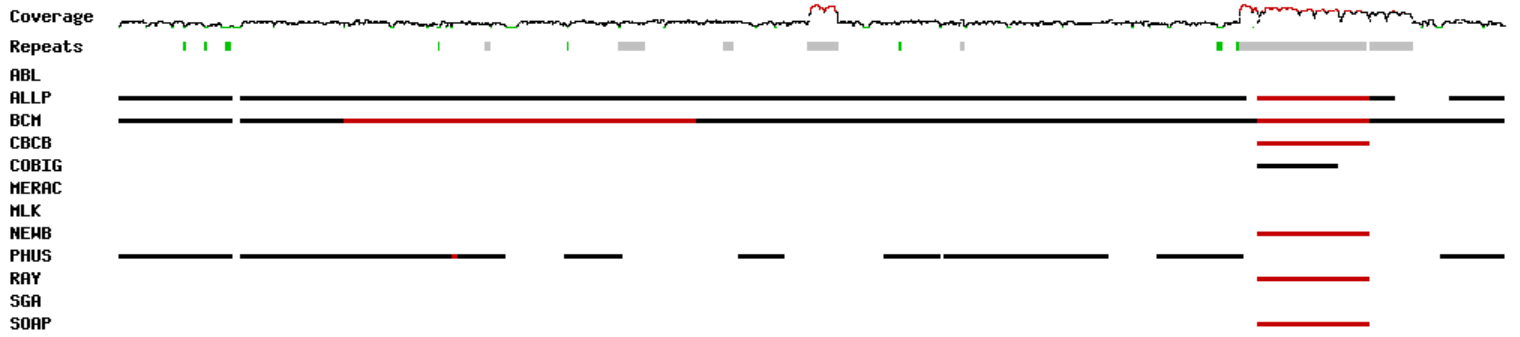

NODE\_1\_length\_33743\_cov\_1554.570679

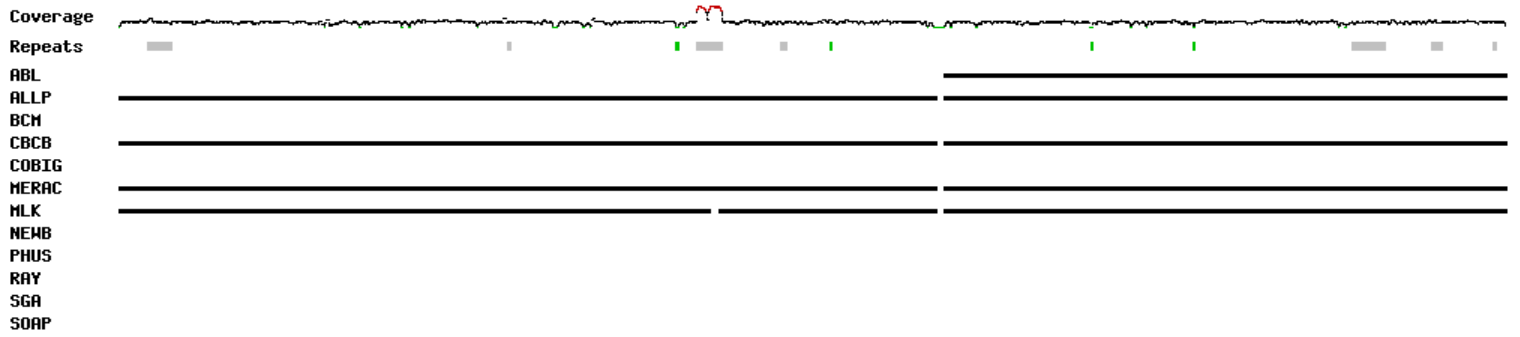

NODE\_1\_length\_34498\_cov\_482.640869

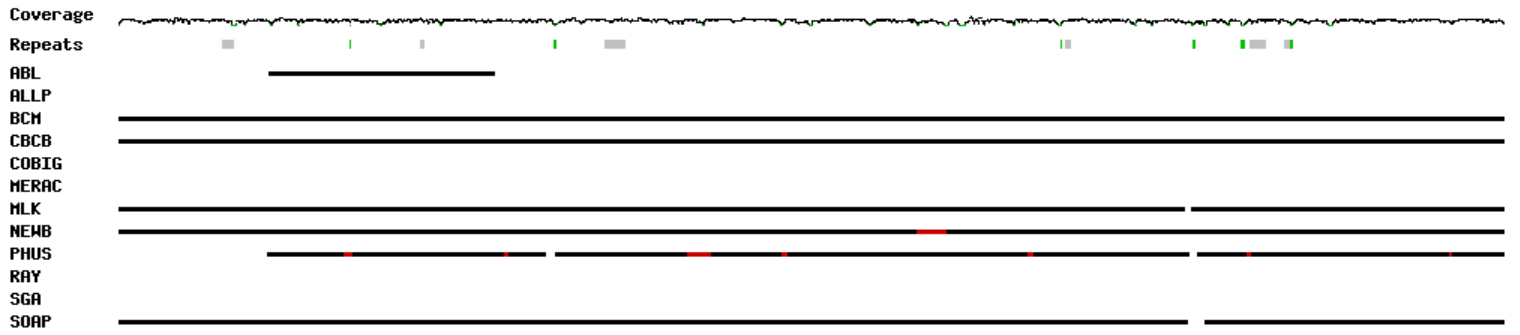

NODE\_1\_length\_37535\_cov\_2361,421875

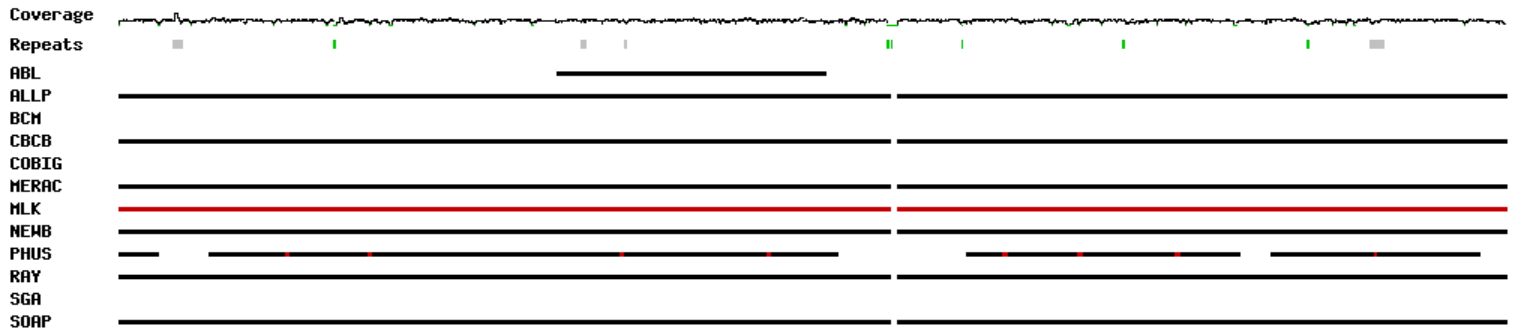

NODE\_1\_length\_41253\_cov\_383,616119

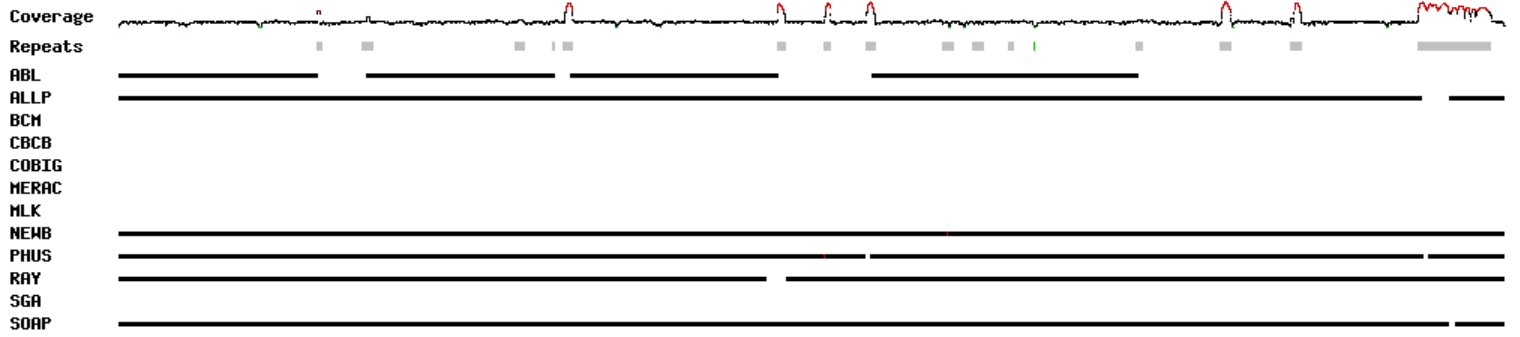

NODE\_2\_length\_27853\_cov\_1191.676636

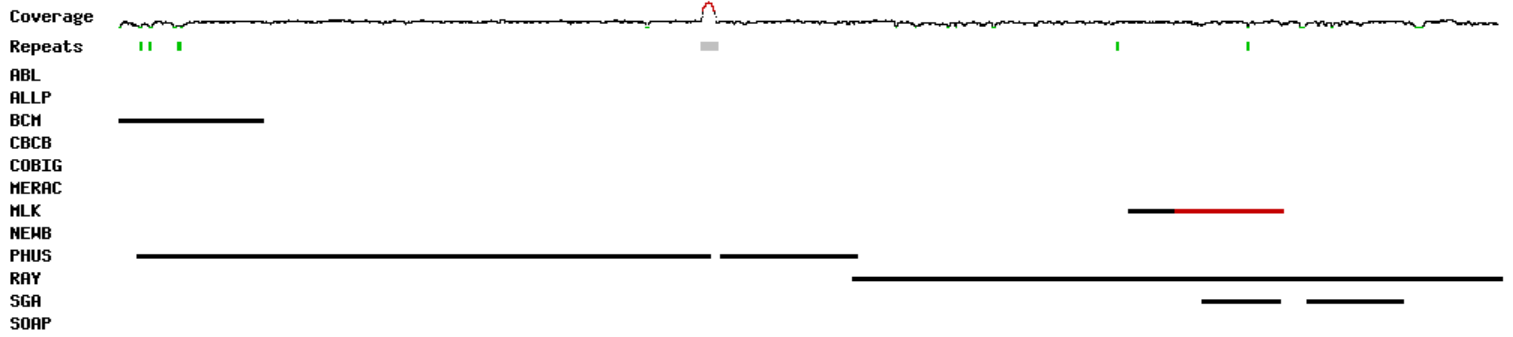



NODE\_2\_length\_35478\_cov\_436.451477

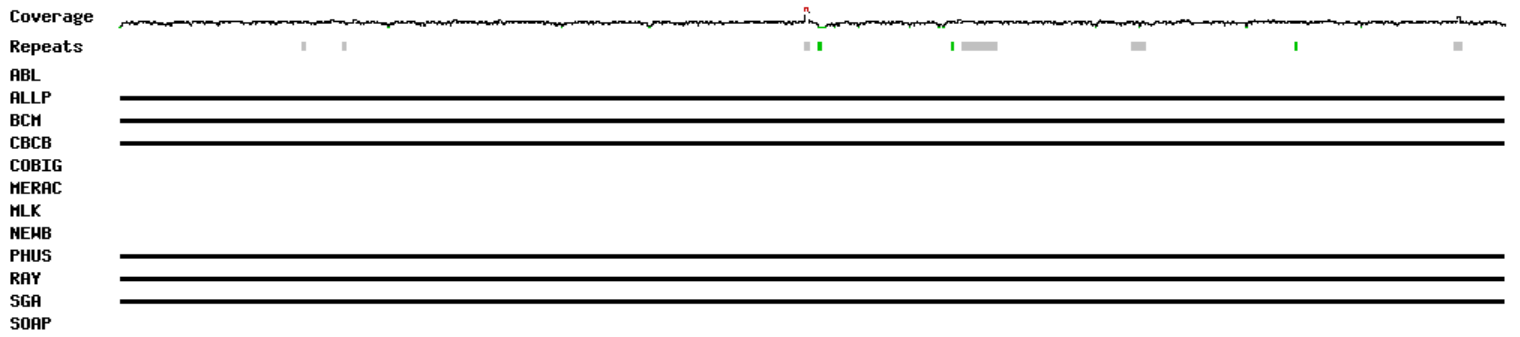

NODE\_2\_length\_35880\_cov\_505,539124

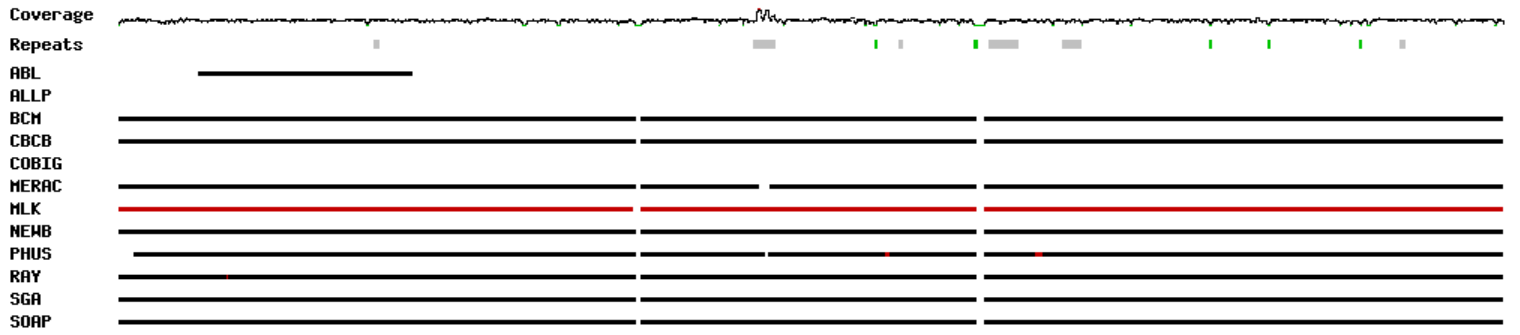

NODE\_2\_length\_40531\_cov\_359,668182

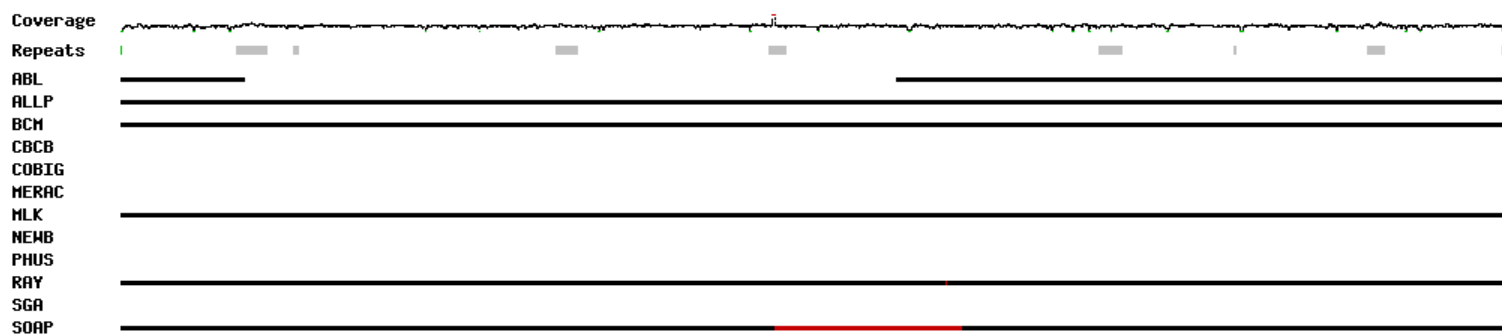

NODE\_3\_length\_6314\_cov\_1148.913574

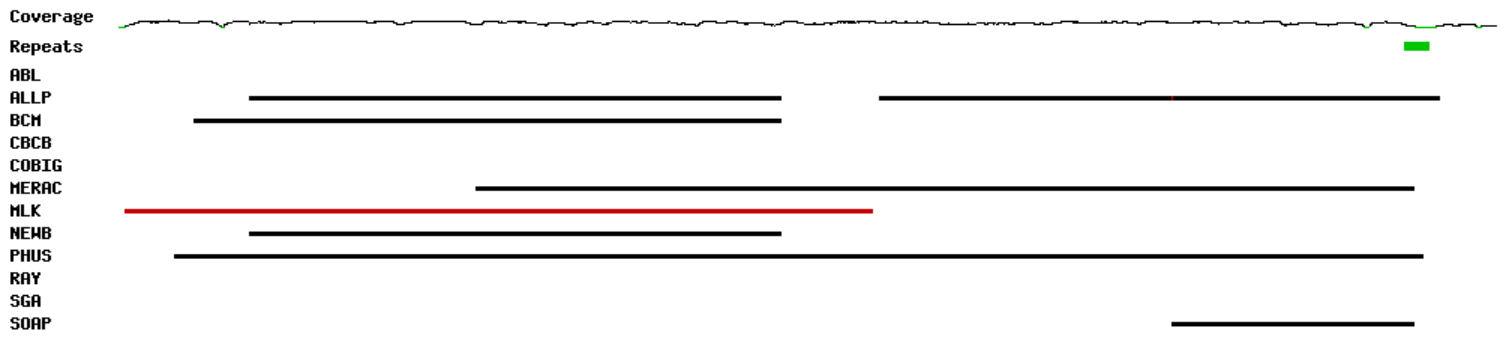

NODE\_3\_length\_9381\_cov\_227.765274

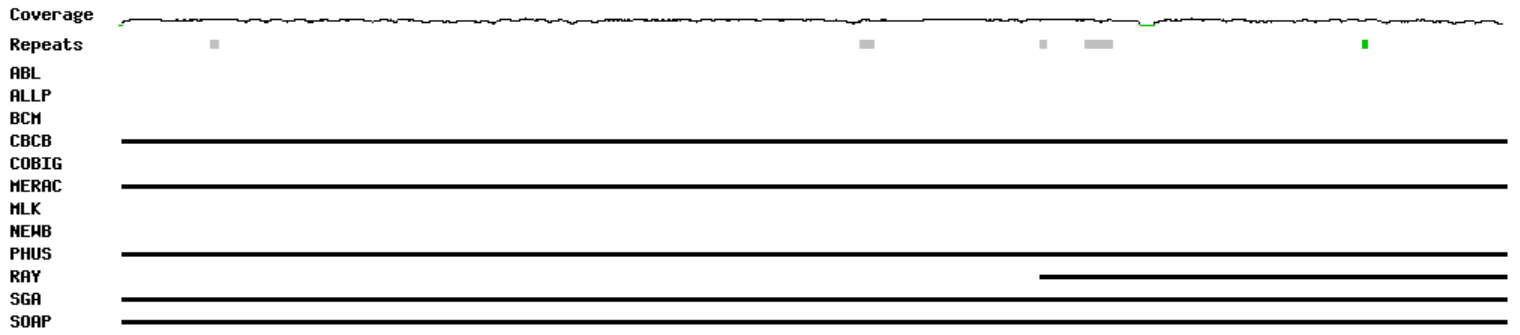

NODE\_3\_length\_26798\_cov\_1667.007935

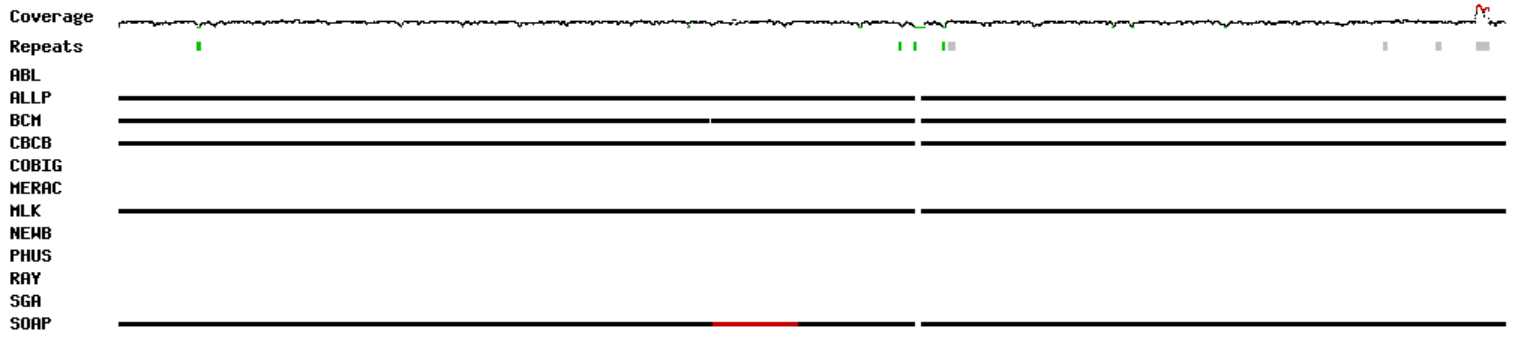

NODE\_4\_length\_14780\_cov\_668.011047

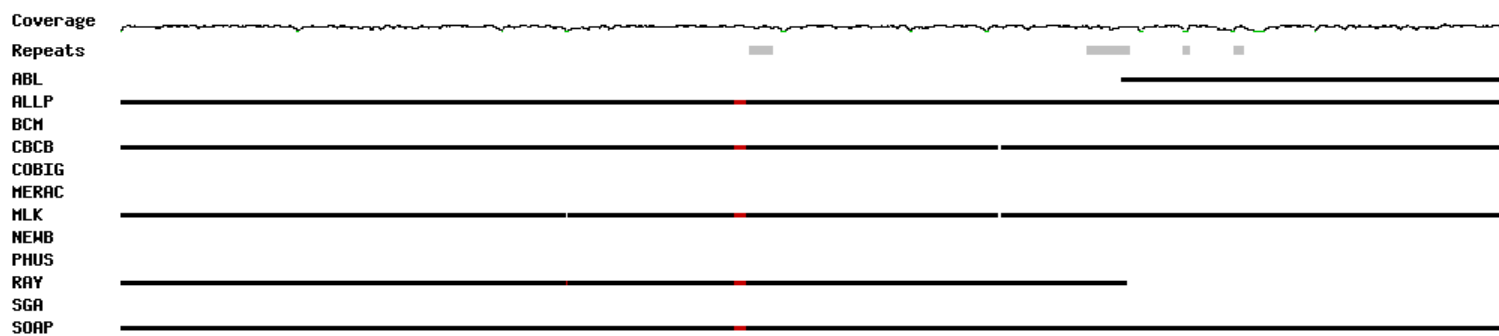

NODE\_4\_length\_24363\_cov\_610.697510

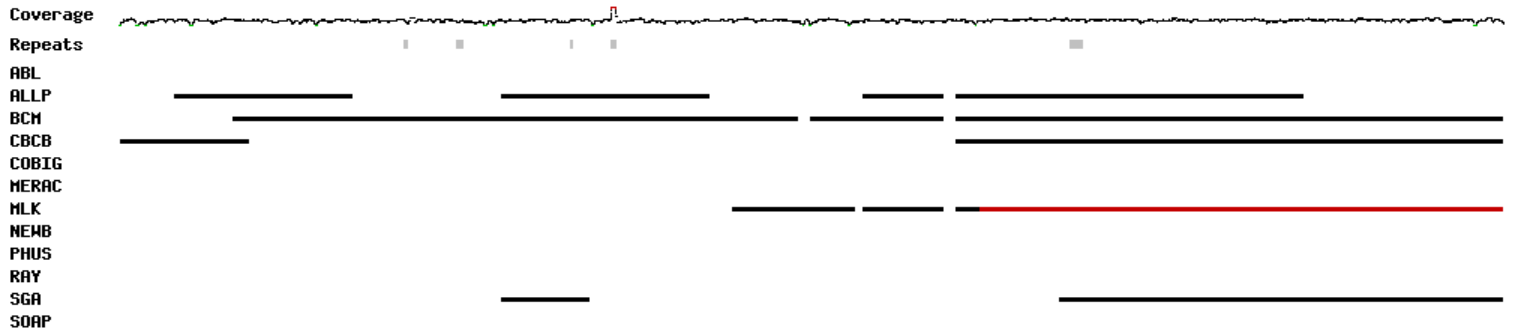



NODE\_5\_length\_33686\_cov\_944,898315

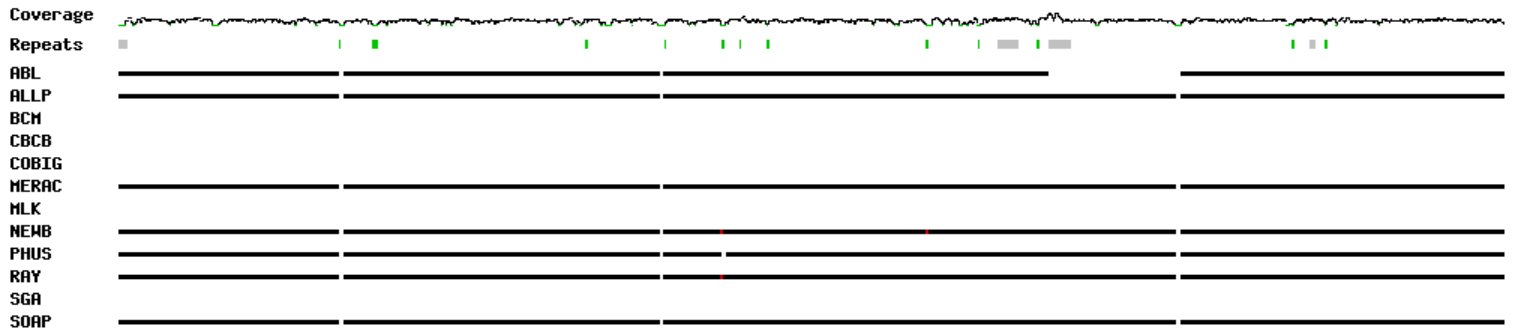

NODE\_5\_length\_35321\_cov\_505.759521

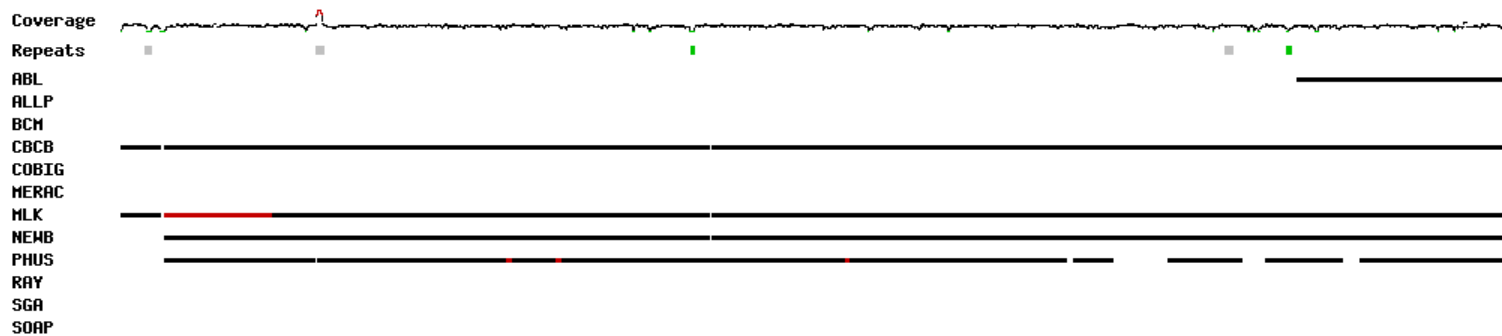

NODE\_5\_length\_36389\_cov\_697,371704

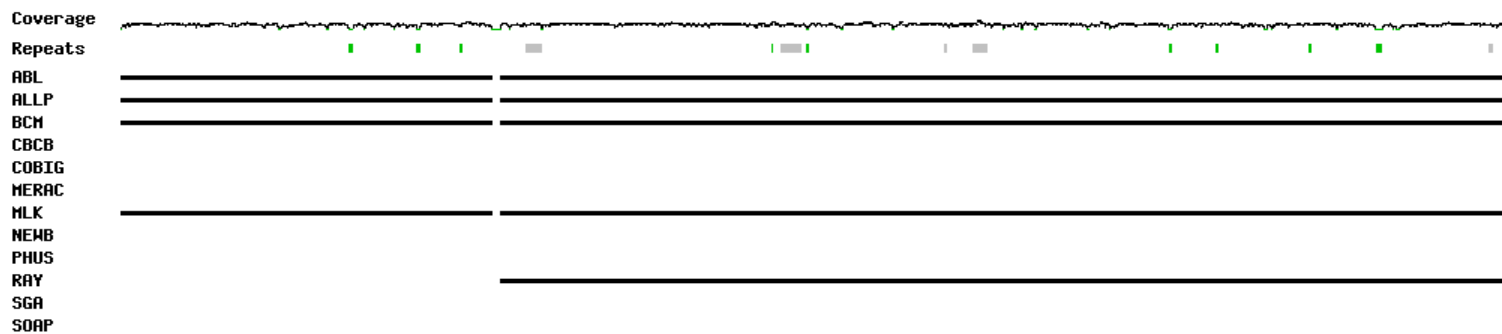

NODE\_6\_length\_15089\_cov\_930.195557

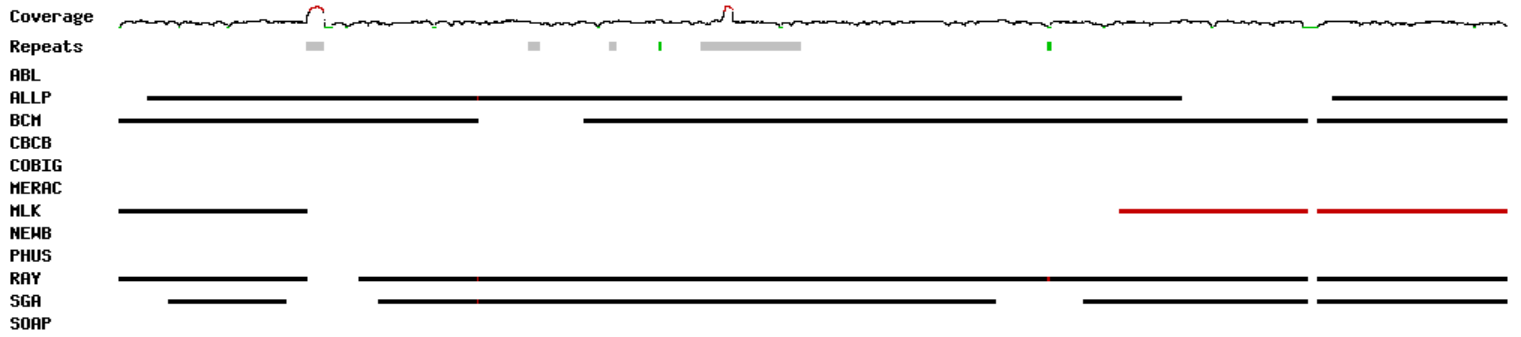

NODE\_6\_length\_32753\_cov\_360.108215

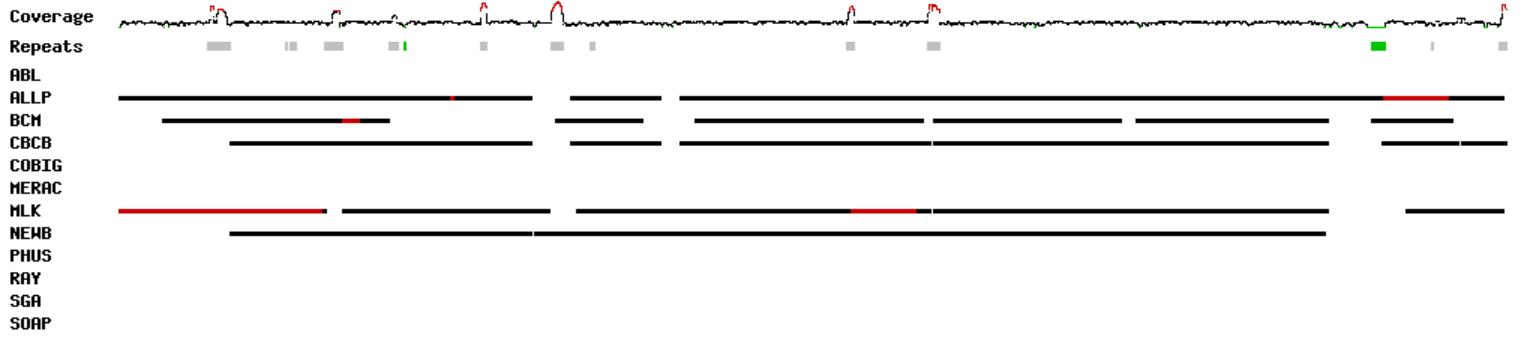

NODE\_7\_length\_6906\_cov\_670.657715

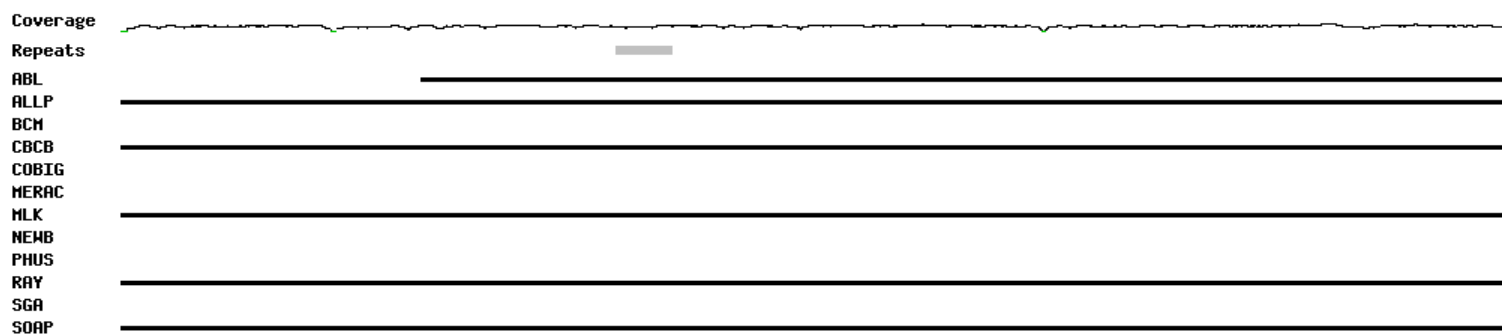

NODE\_7\_length\_34648\_cov\_668.417358

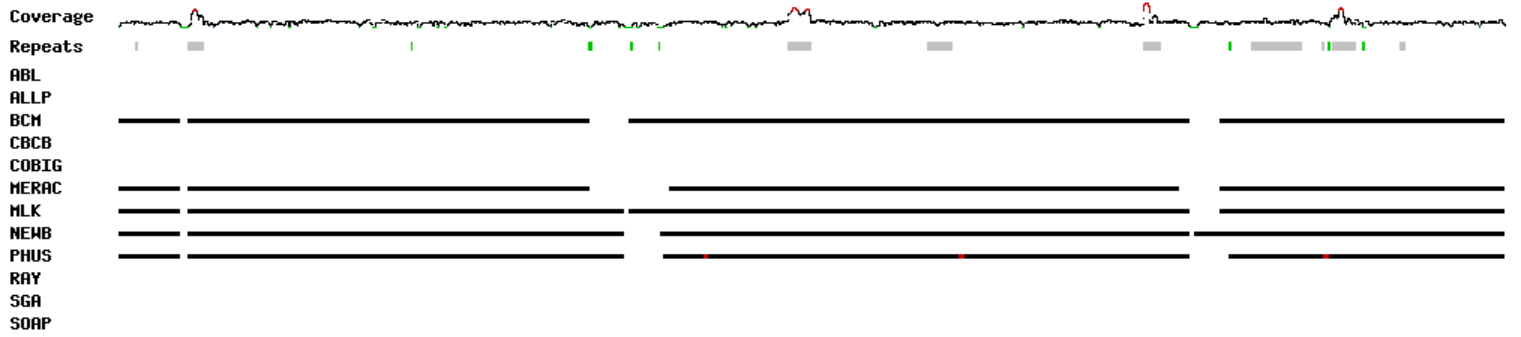

NODE\_8\_length\_2167\_cov\_586.864319

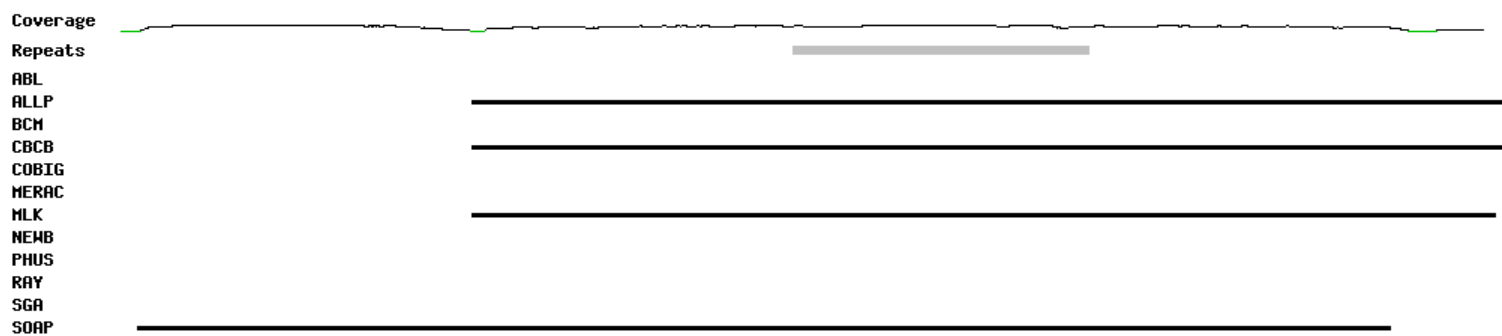



NODE\_9\_length\_4210\_cov\_490.434448

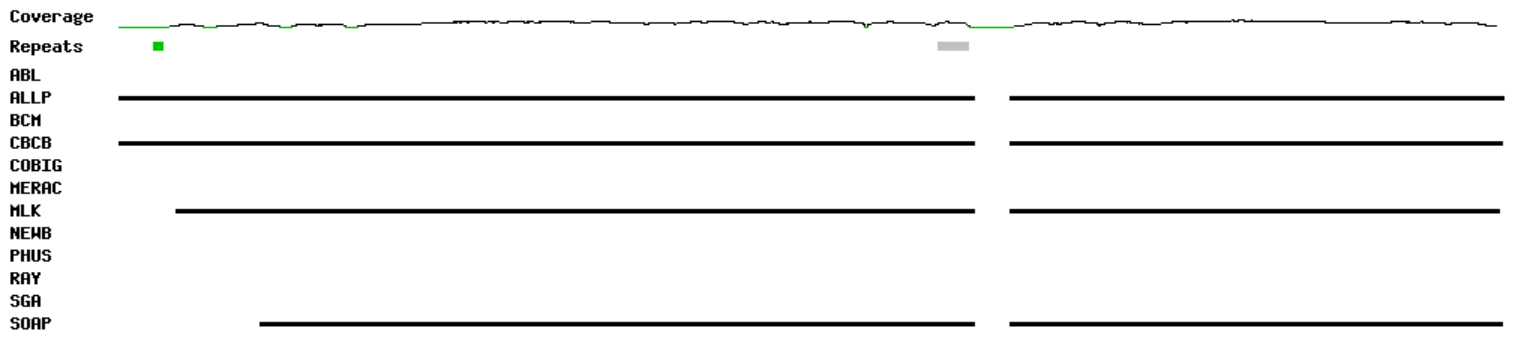

NODE\_9\_length\_36820\_cov\_370.221497

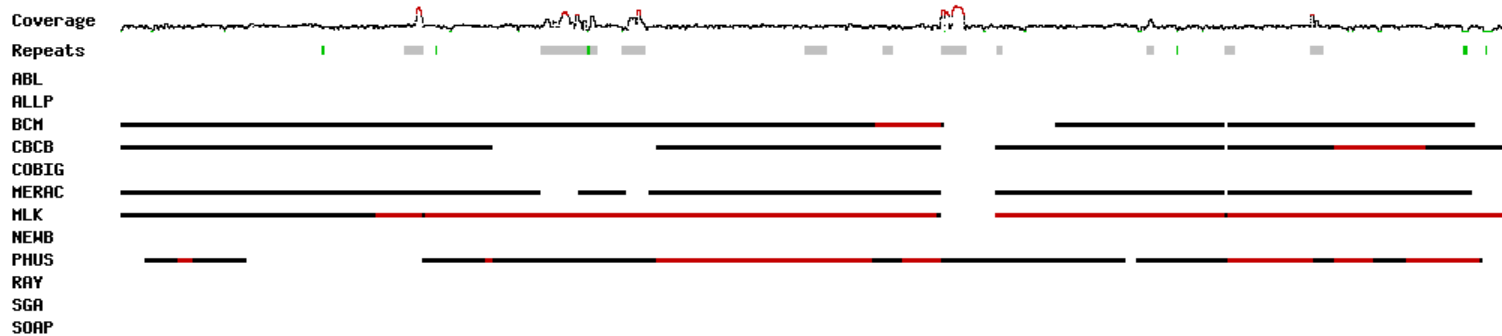

NODE\_10\_length\_10595\_cov\_66.162529

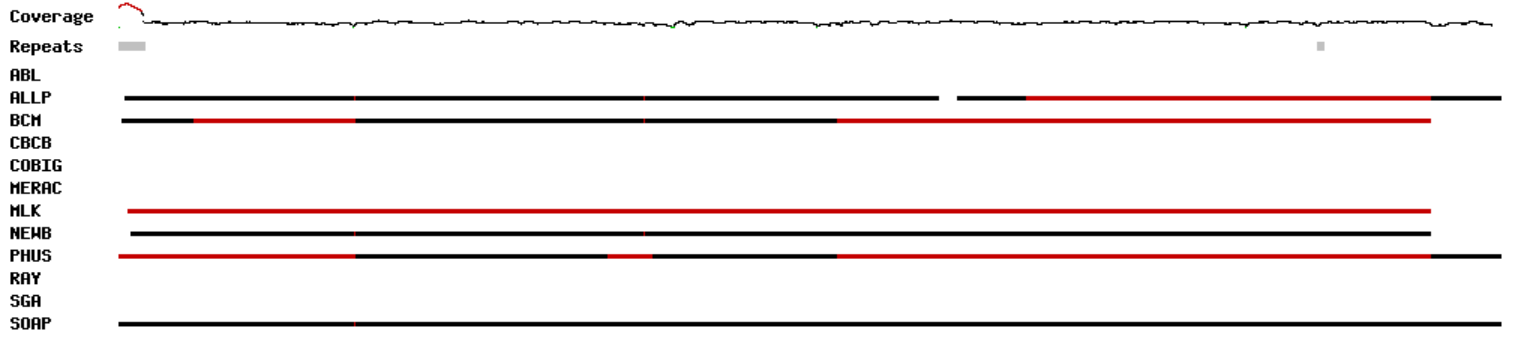

NODE\_11\_length\_1827\_cov\_681.160950

Coverage 

Repeats

ABL 

ALLP

BCN

CBCB

COBIG

MERAC

MLK

NEMB

PHUS

RAY

SGA

SOAP

NODE\_11\_length\_33487\_cov\_498.197052

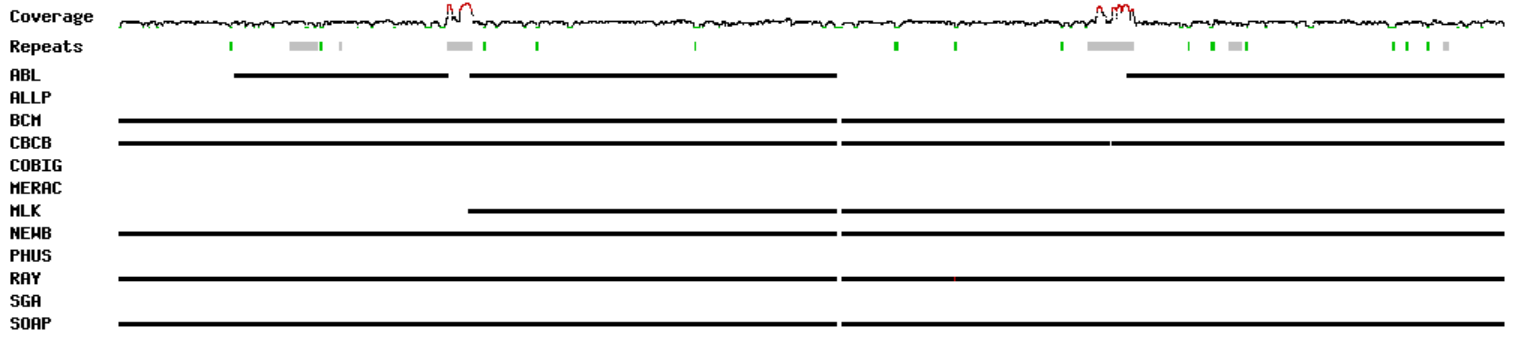

NODE\_12\_length\_5742\_cov\_324.865021

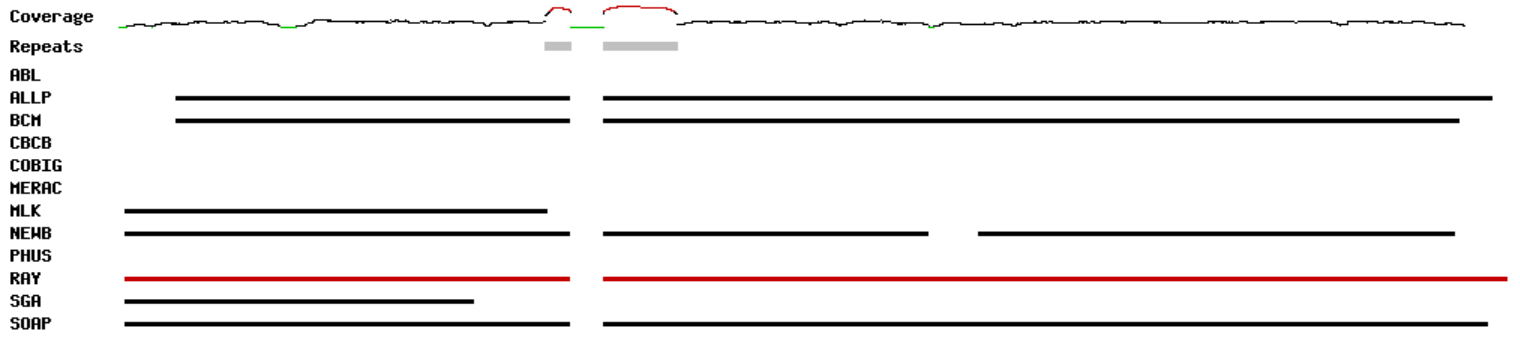

NODE\_13\_length\_19627\_cov\_215.112396

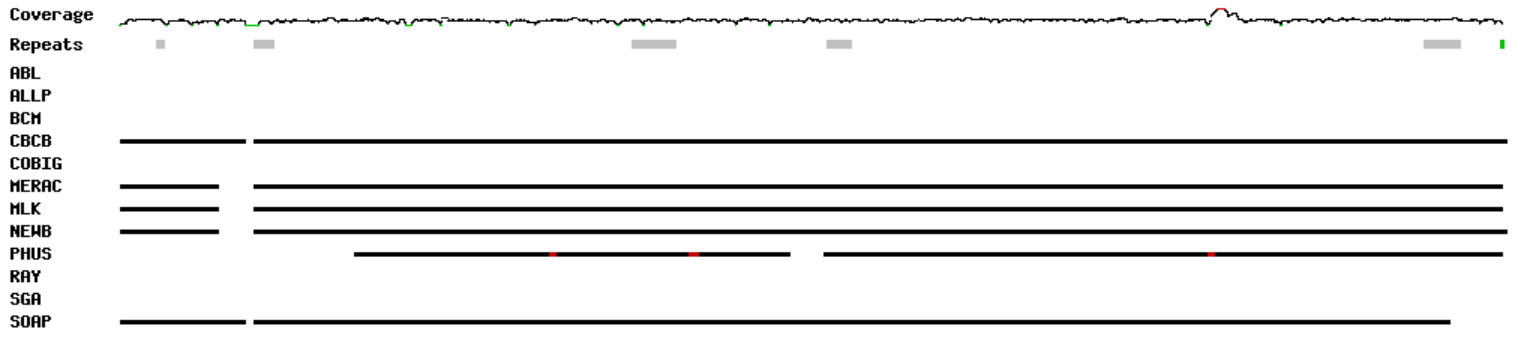

NODE\_14\_length\_34330\_cov\_372.661804

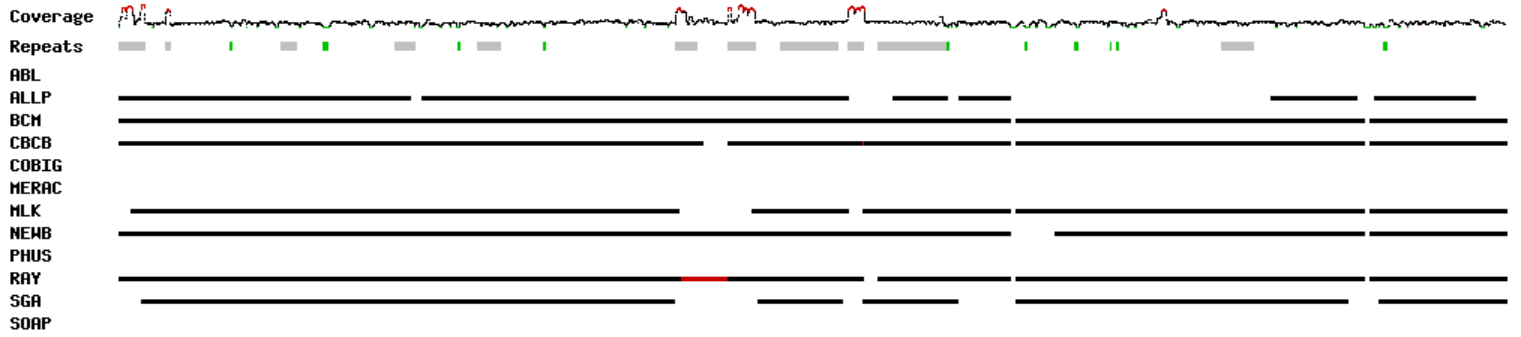



NODE\_15\_length\_5020\_cov\_178.050598

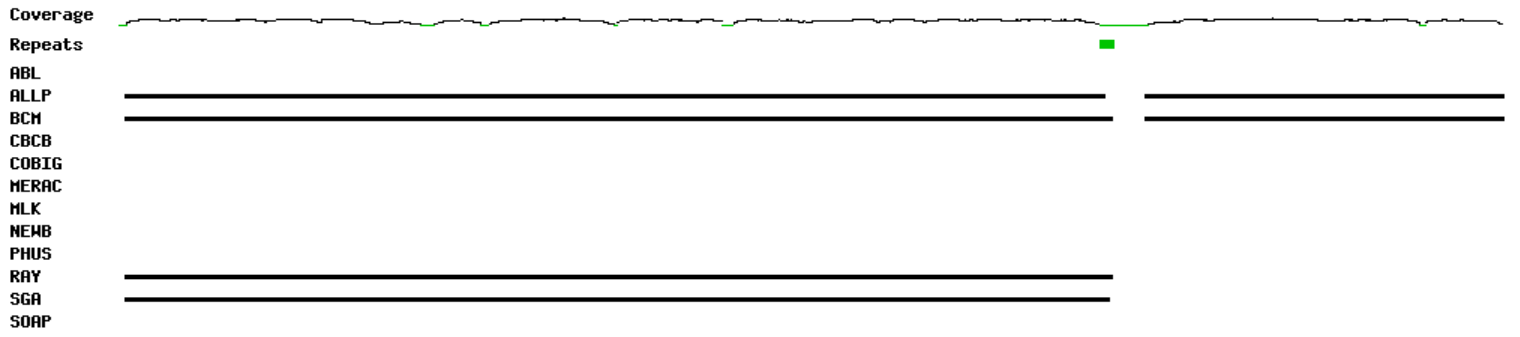

NODE\_18\_length\_14547\_cov\_77.550972

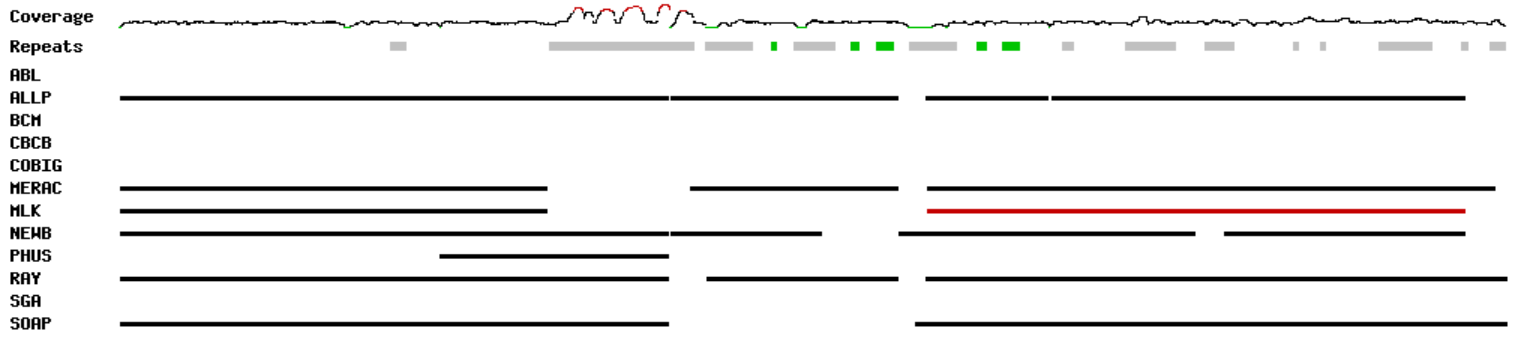

NODE\_19\_length\_23652\_cov\_273.268646

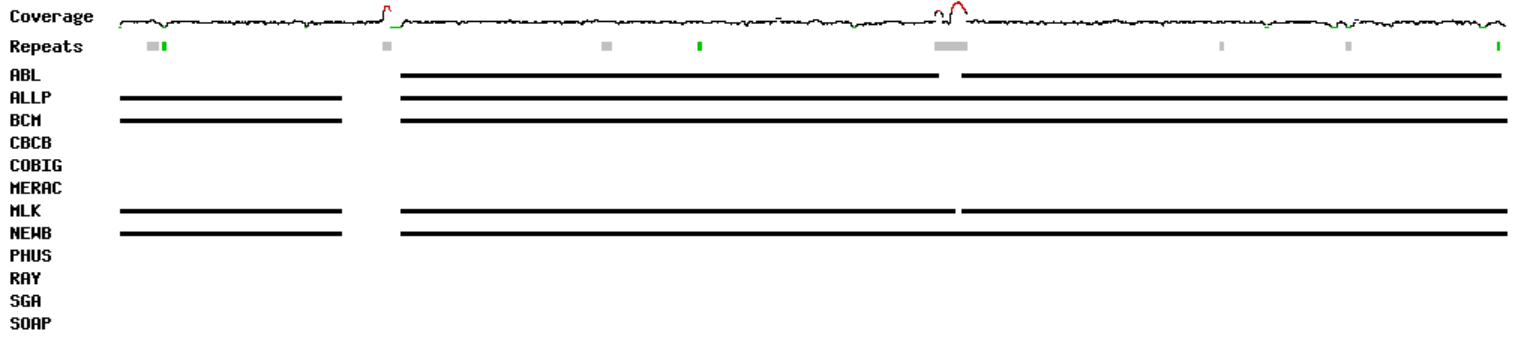

NODE\_20\_length\_20288\_cov\_100.324333

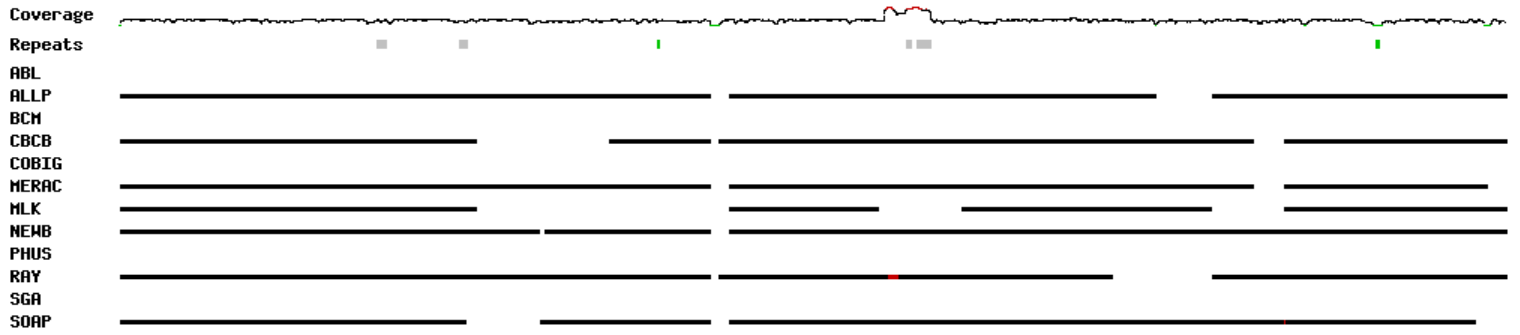

NODE\_21\_length\_11654\_cov\_92,578430

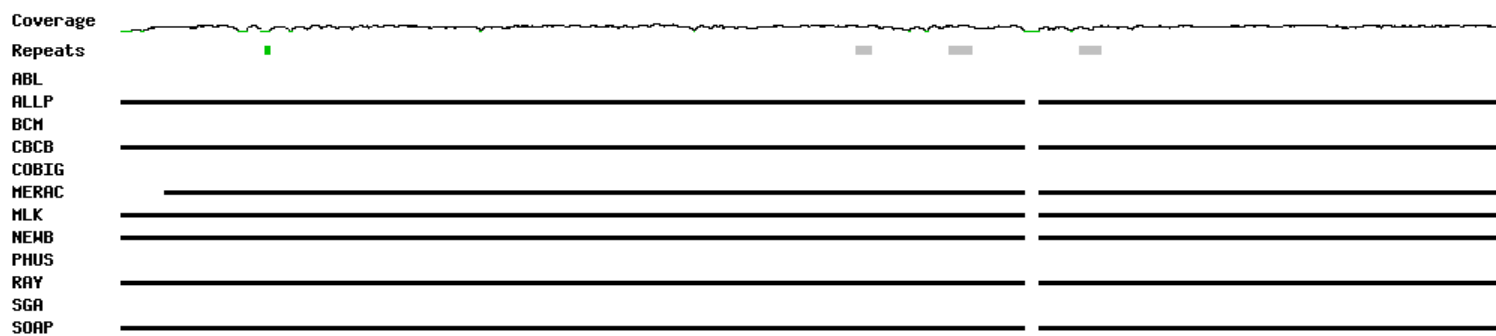

NODE\_22\_length\_42243\_cov\_170.092619

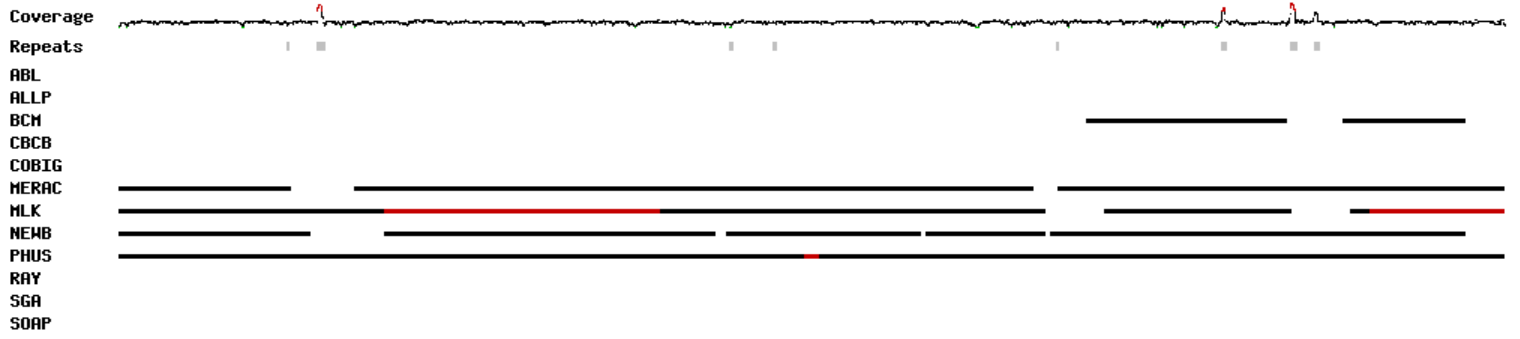

NODE\_23\_length\_24174\_cov\_70.672455

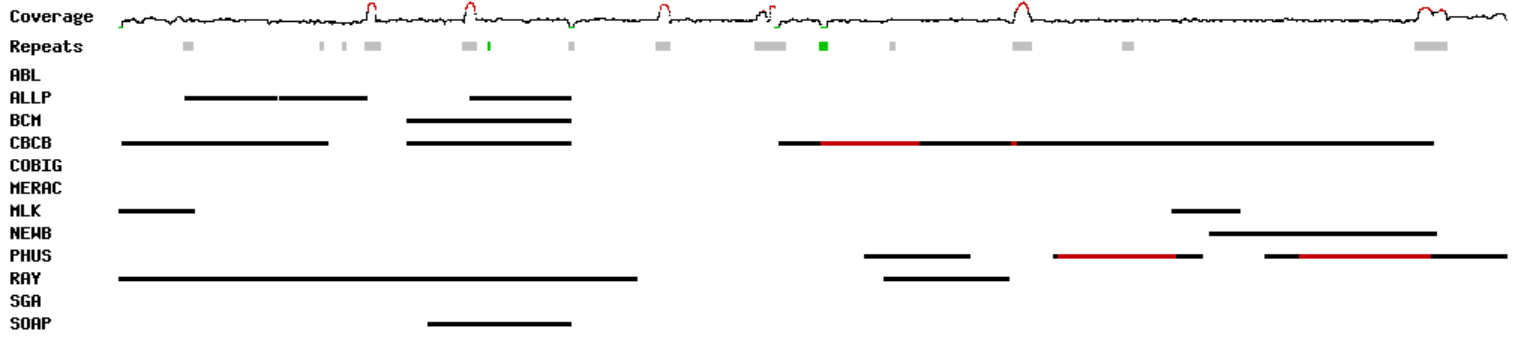

NODE\_25\_length\_6388\_cov\_197.772537

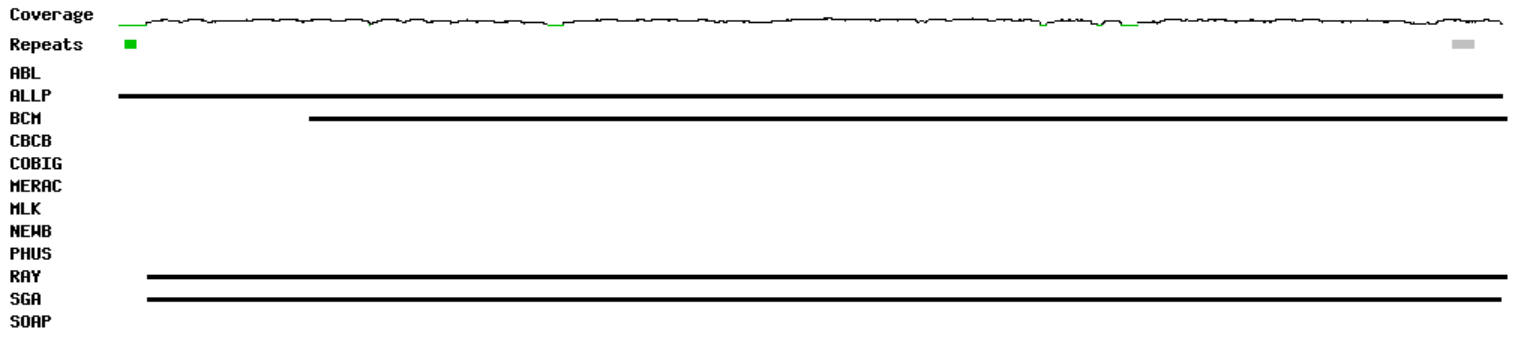



NODE\_28\_length\_6862\_cov\_75.754295

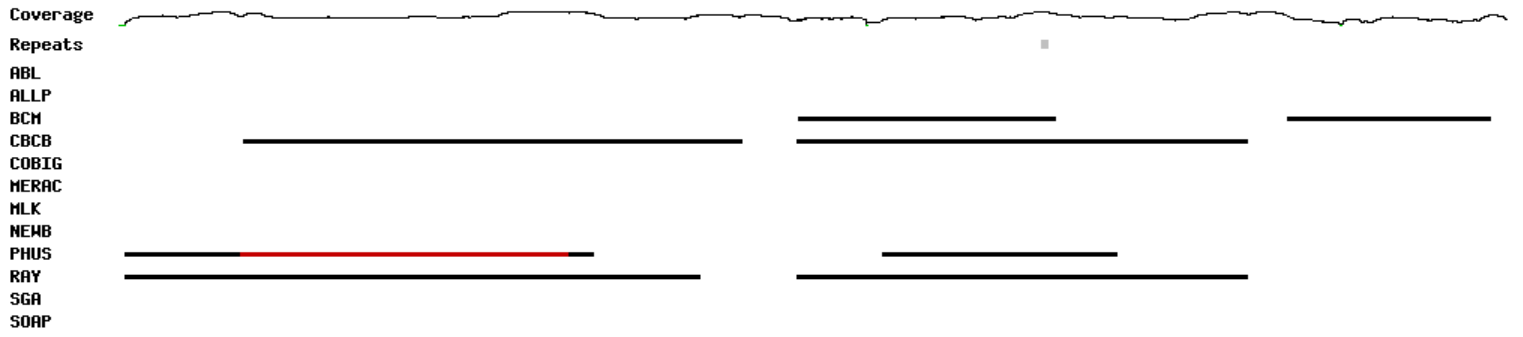

NODE\_29\_length\_24535\_cov\_73.747421

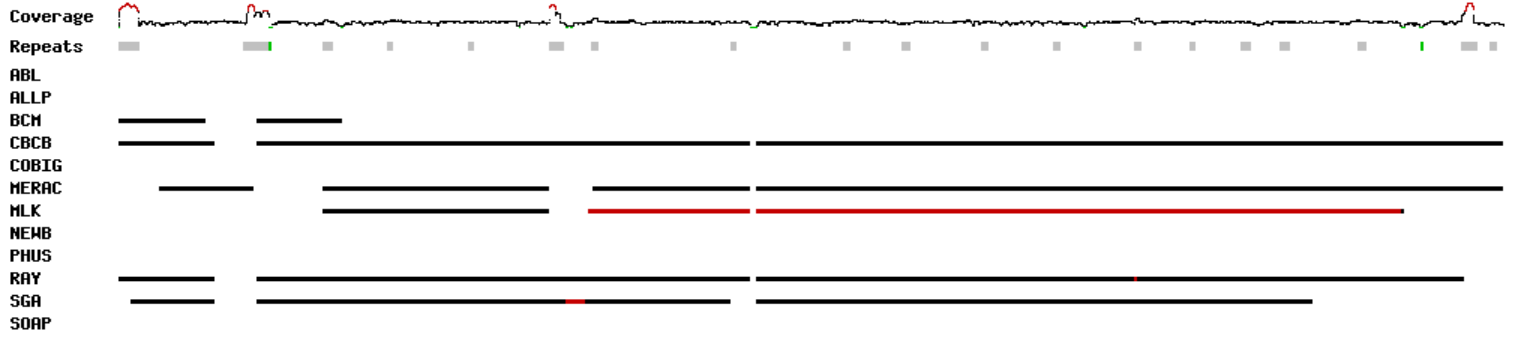

NODE\_33\_length\_30143\_cov\_171.982346

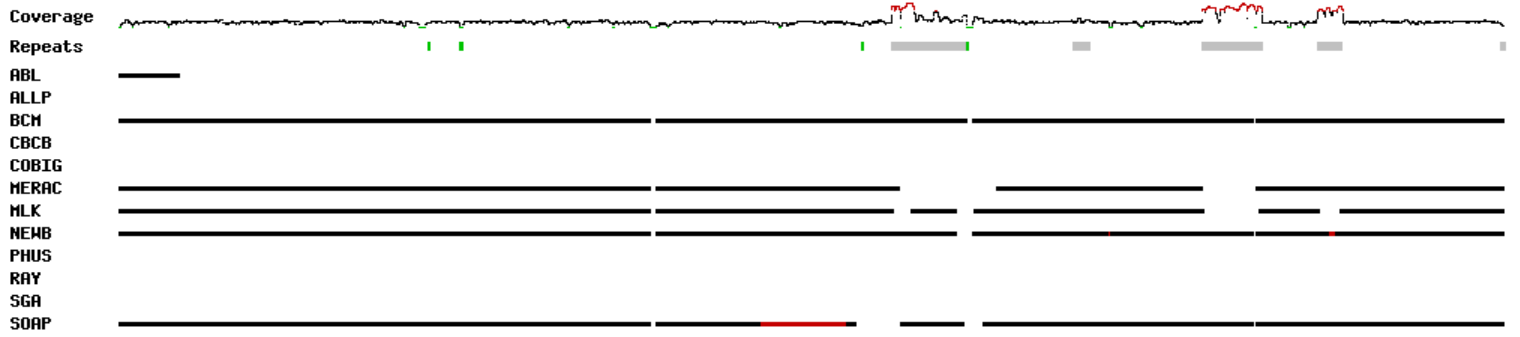

NODE\_38\_length\_15765\_cov\_81.564796

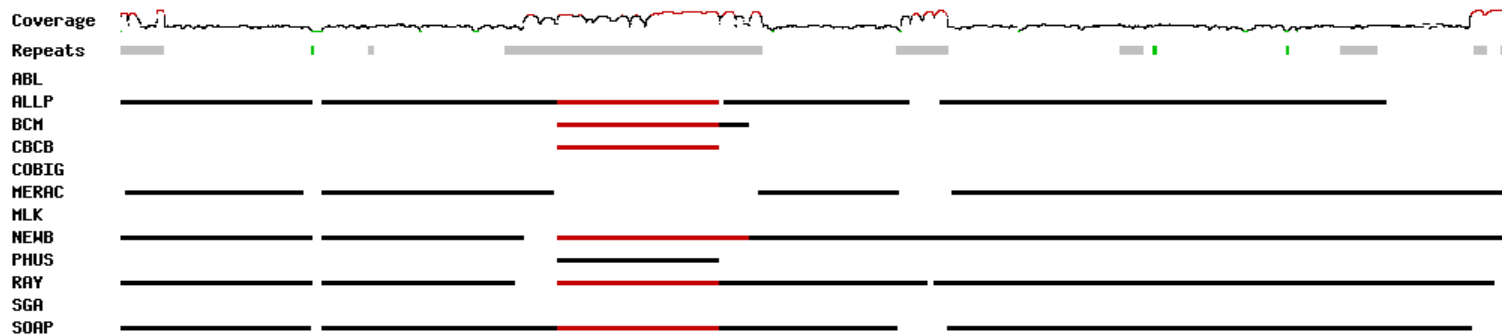

NODE\_42\_length\_1389\_cov\_61.779697

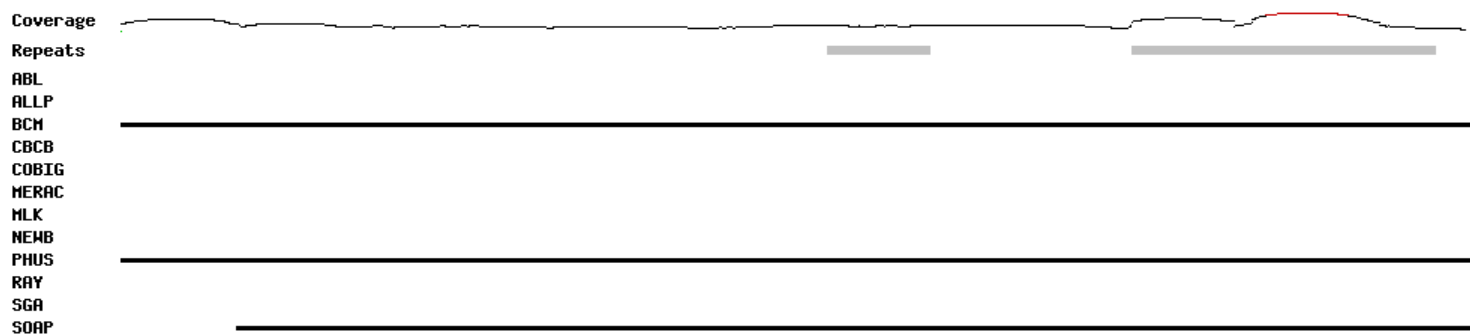

NODE\_52\_length\_44140\_cov\_127.333710

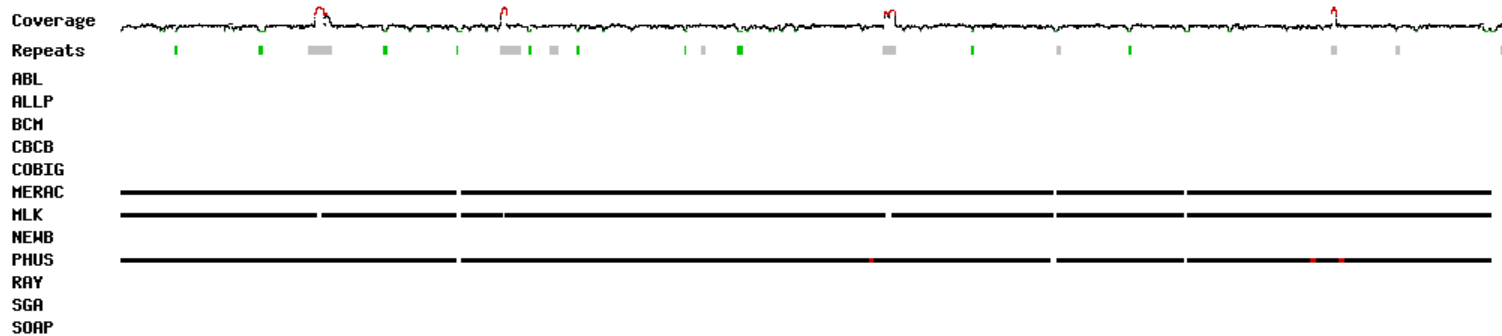

Supplement: 2047-217X-2-10-S7.pdf [file 2047-217X-2-10-S7.pdf]
