# Supplementary material for: Assemblathon 2: evaluating de novo methods of genome assembly in three vertebrate species
Source: PubMed Central journal article supplement (PMC3844414; doi:10.1186/2047-217x-2-10), 2013-07-22

NODE\_1\_length\_7806\_cov\_1659.765869

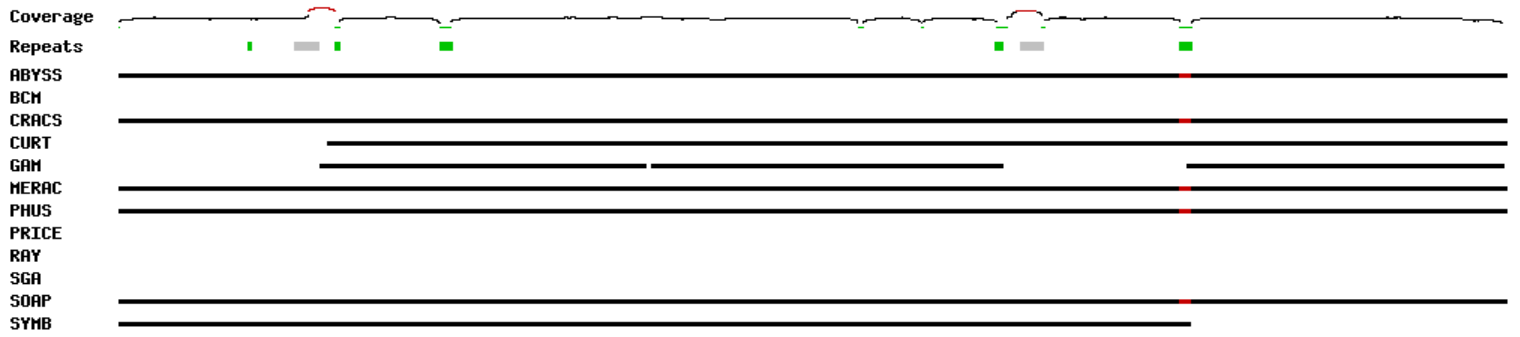

NODE\_1\_length\_7941\_cov\_2390,277832

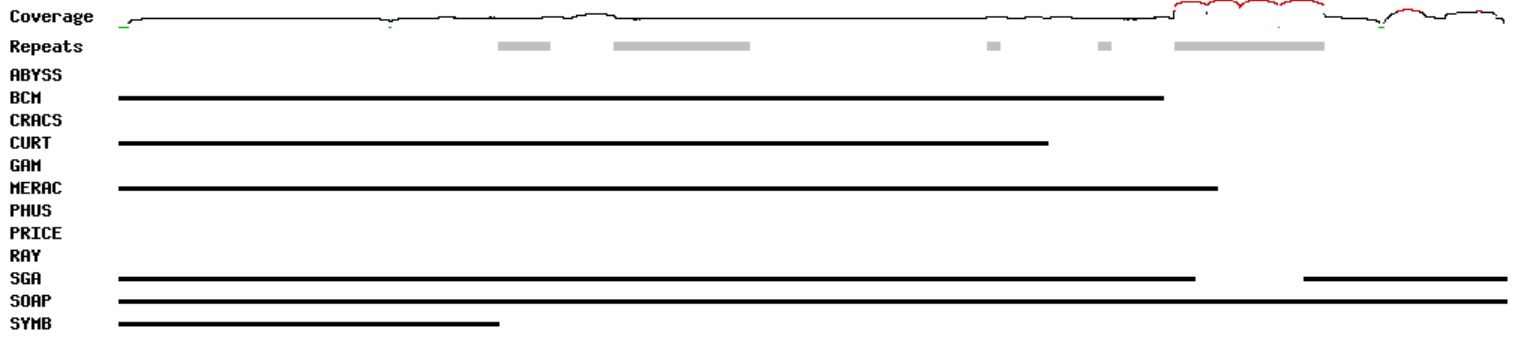

NODE\_1\_length\_18442\_cov\_1998,580811

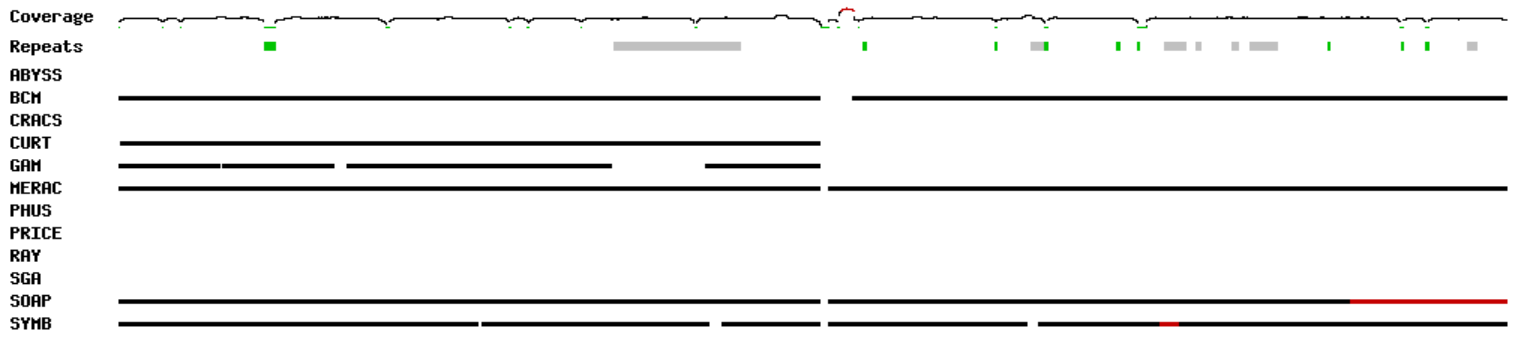

NODE\_1\_length\_30872\_cov\_6594.962402

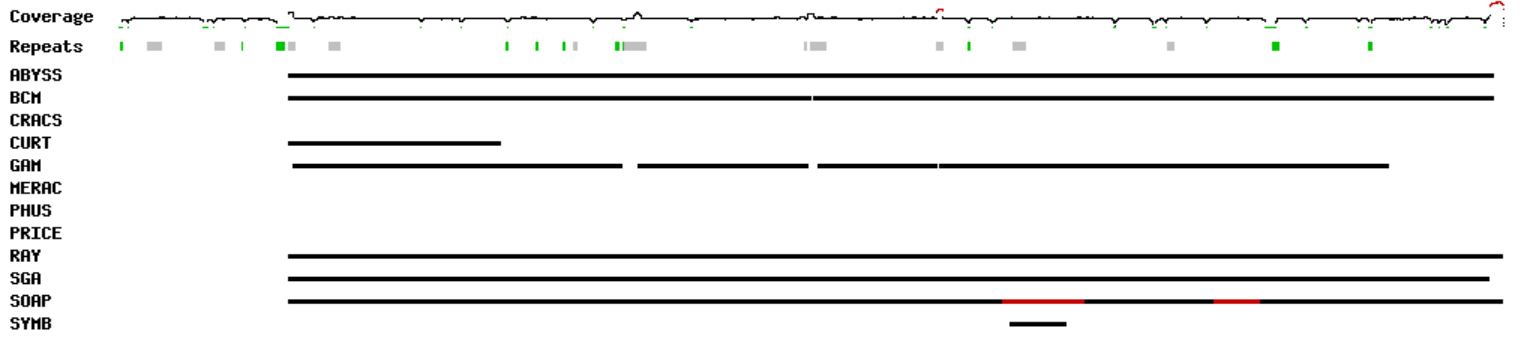

NODE\_2\_length\_5427\_cov\_923.974365

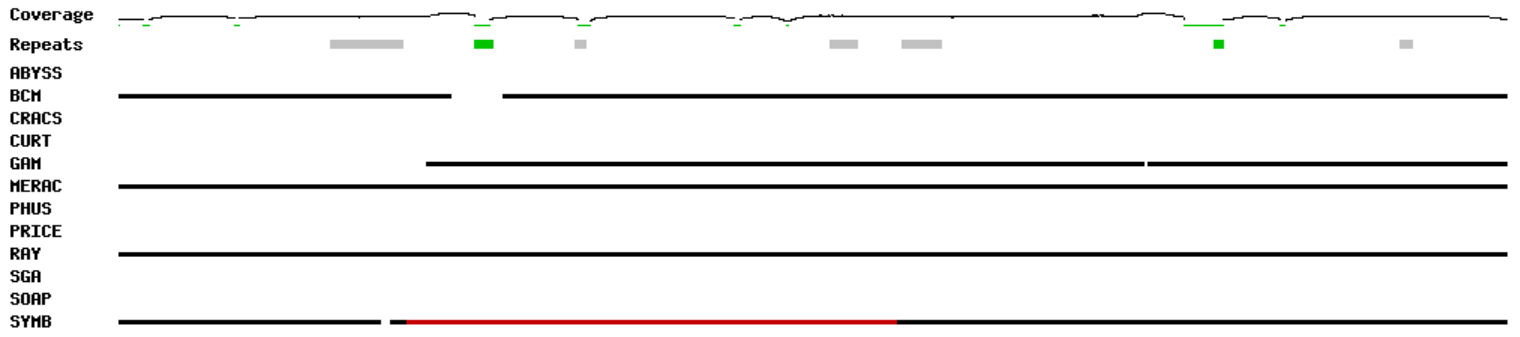

NODE\_2\_length\_10119\_cov\_1537.067505

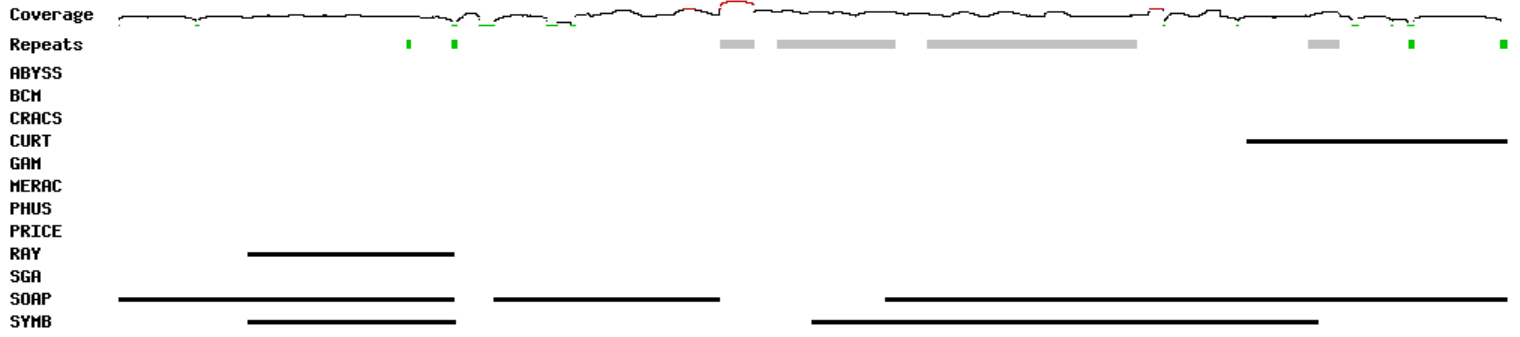

NODE\_2\_length\_28269\_cov\_1654.905151

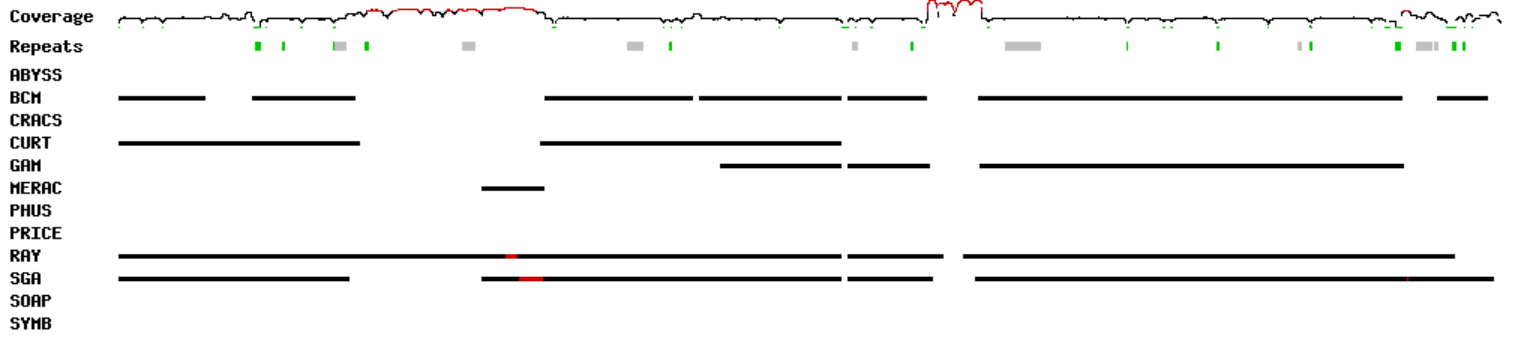

NODE\_3\_length\_7344\_cov\_2046,340068

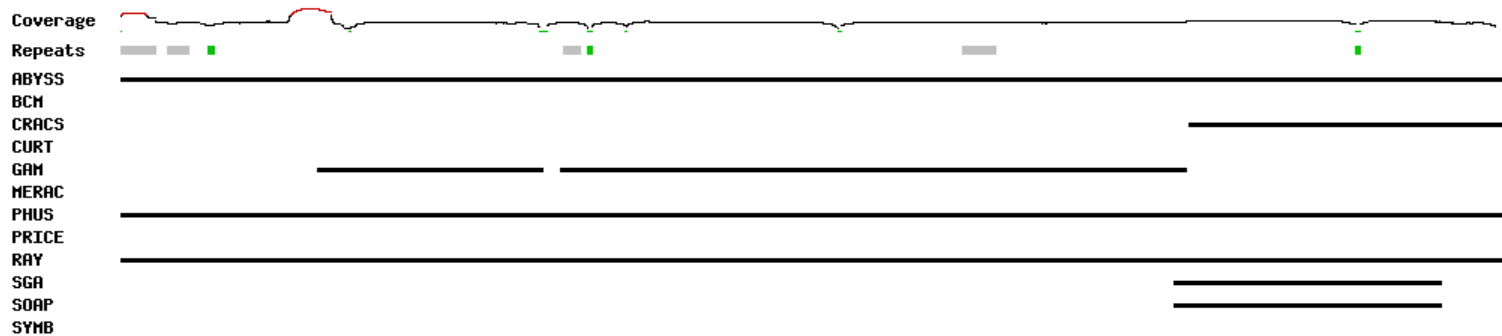



NODE\_3\_length\_15362\_cov\_2024.127319

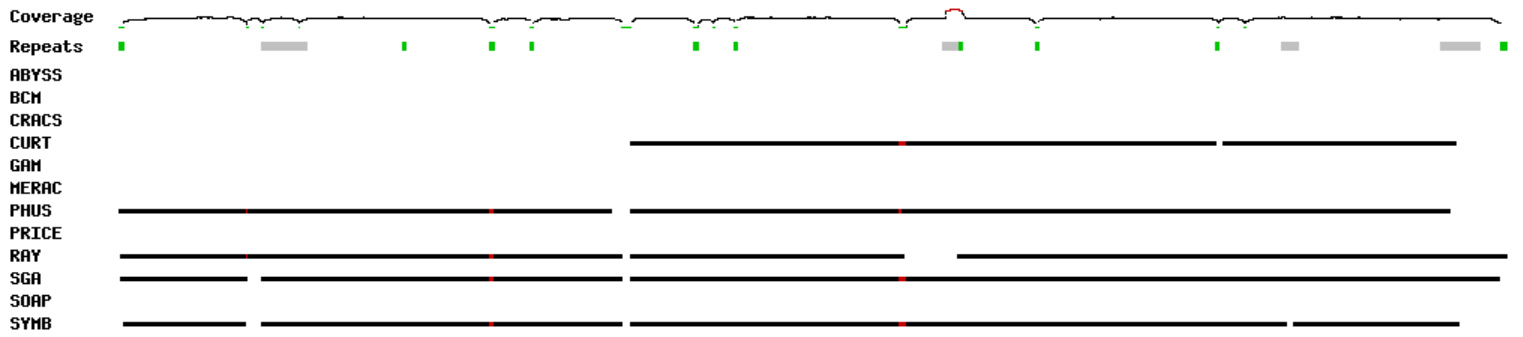

NODE\_3\_length\_38039\_cov\_9758.103516

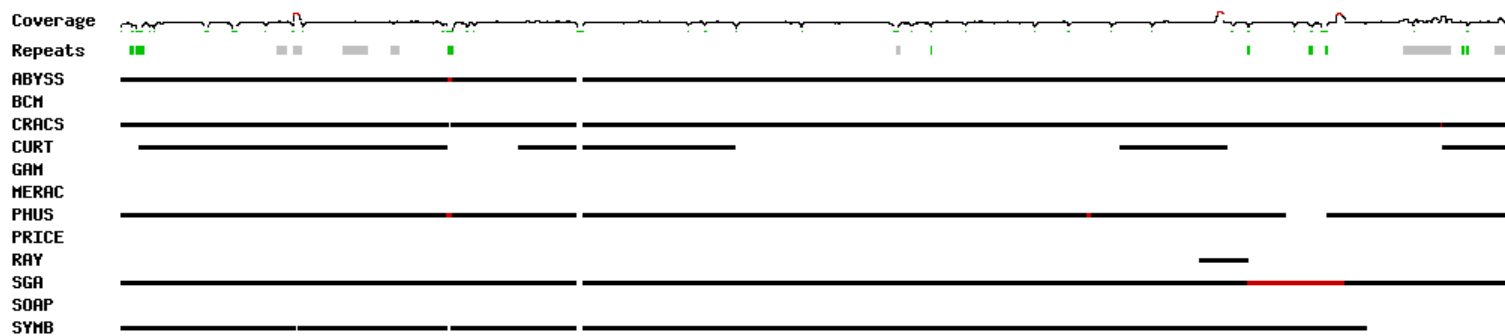

NODE\_4\_length\_15134\_cov\_1858,471802

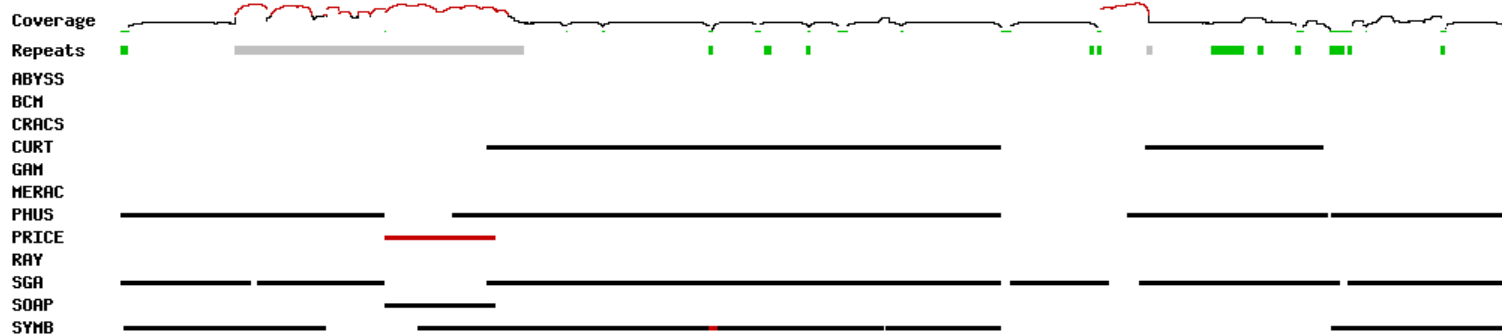

NODE\_5\_length\_4981\_cov\_2091.442363

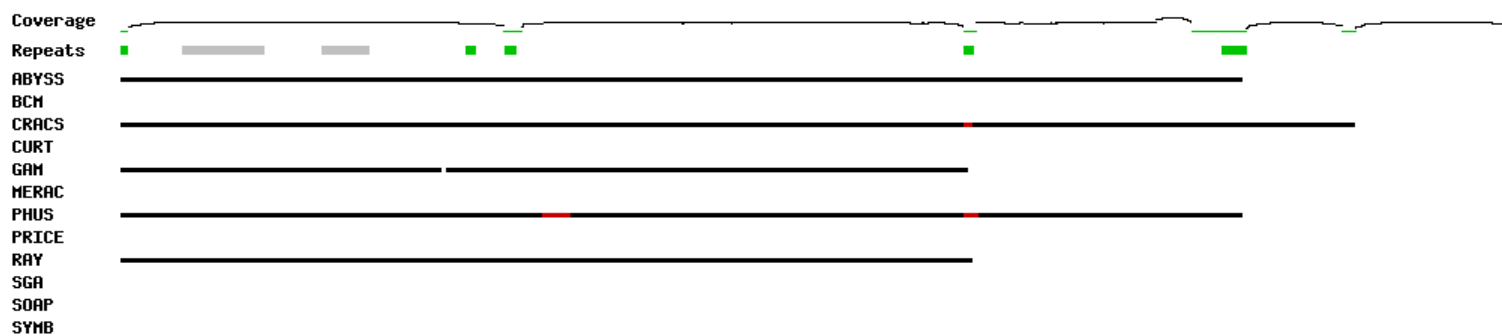

NODE\_5\_length\_12800\_cov\_1895.402222

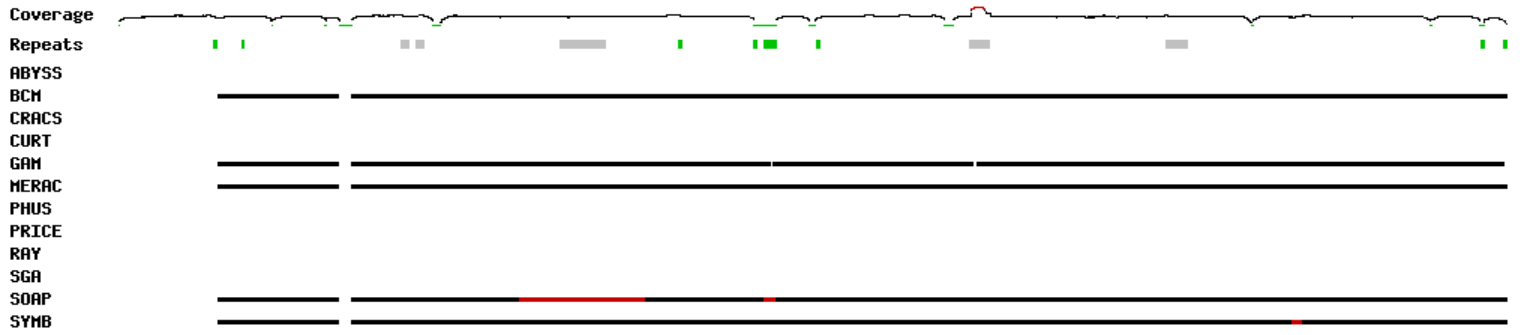

NODE\_6\_length\_2199\_cov\_1042.440186

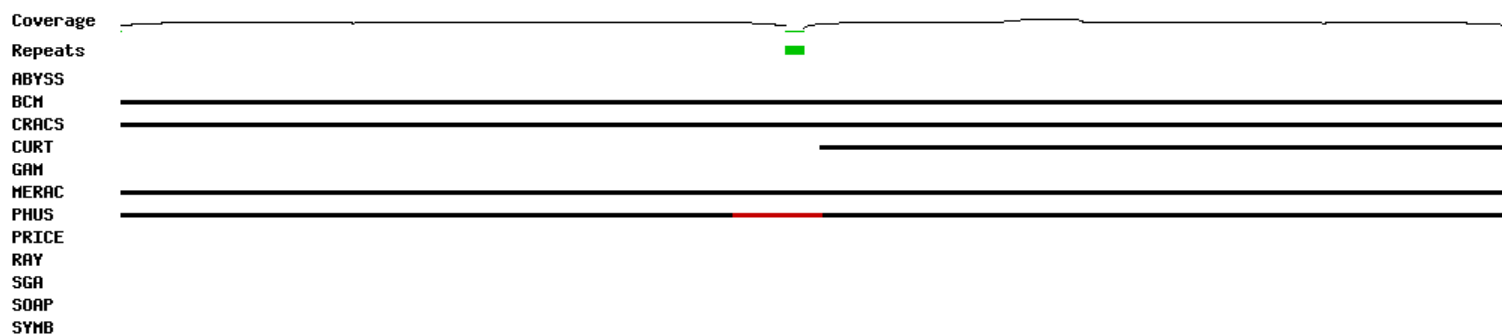

NODE\_6\_length\_3347\_cov\_2063,300293

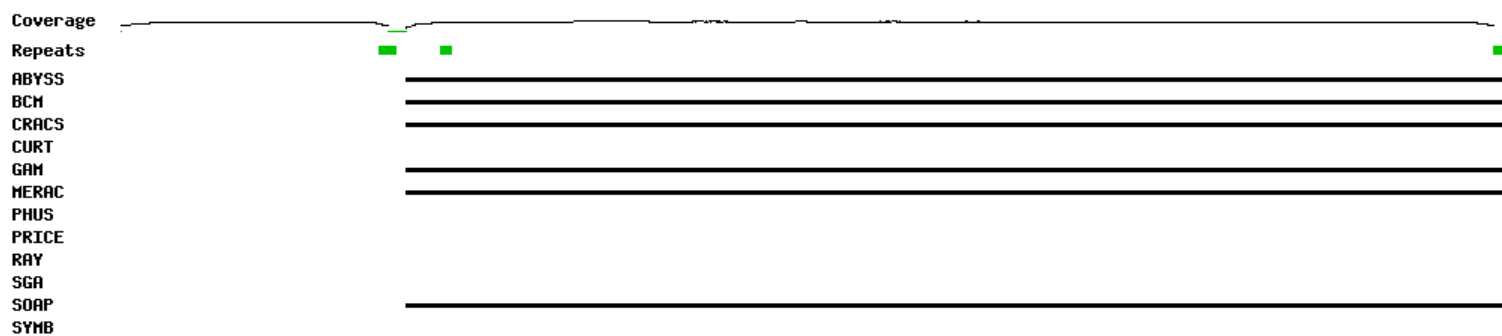

NODE\_7\_length\_31574\_cov\_896.573792

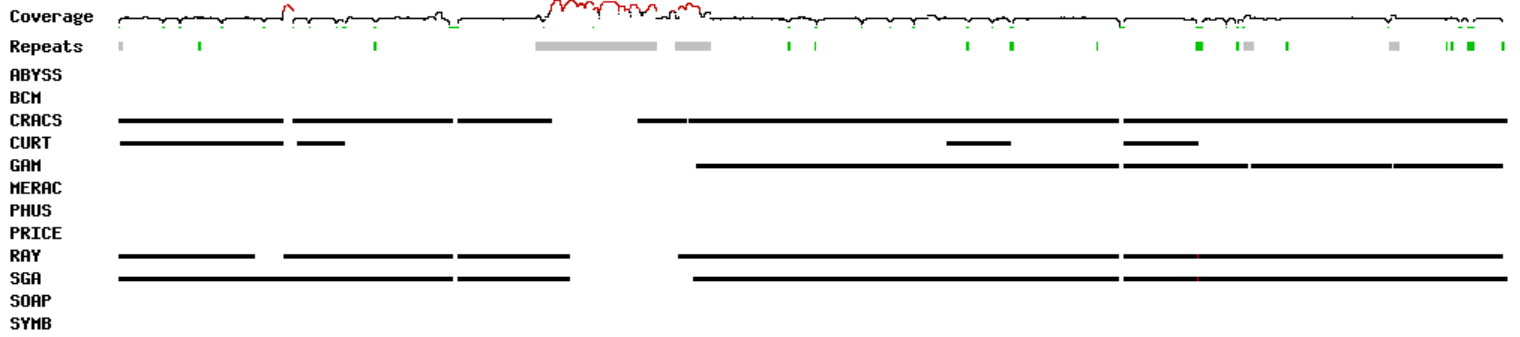



NODE\_8\_length\_32945\_cov\_1546.383423

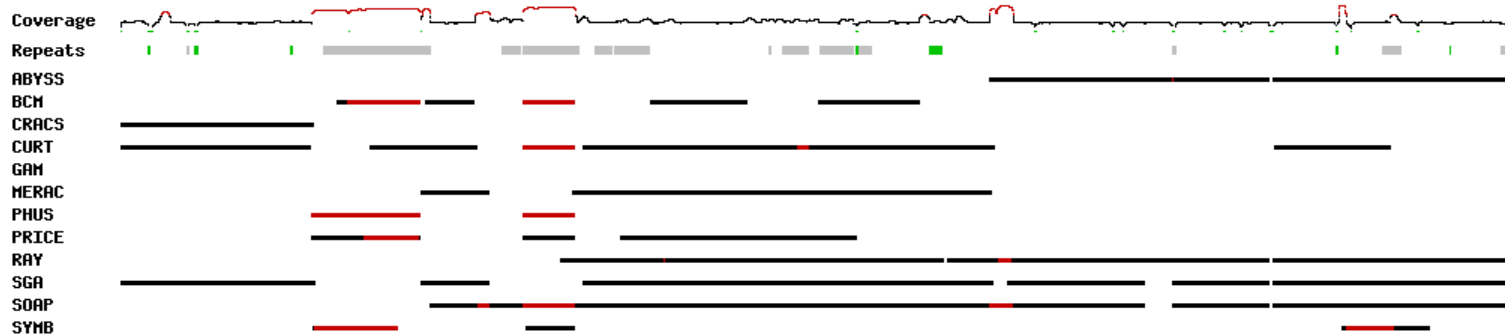

NODE\_10\_length\_20045\_cov\_991.005249

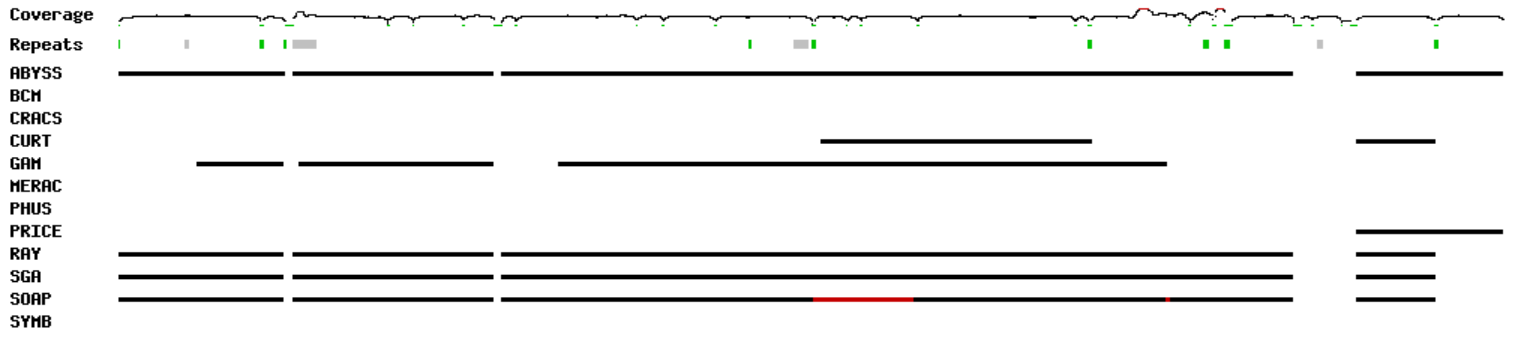

NODE\_10\_length\_21690\_cov\_1635.447144

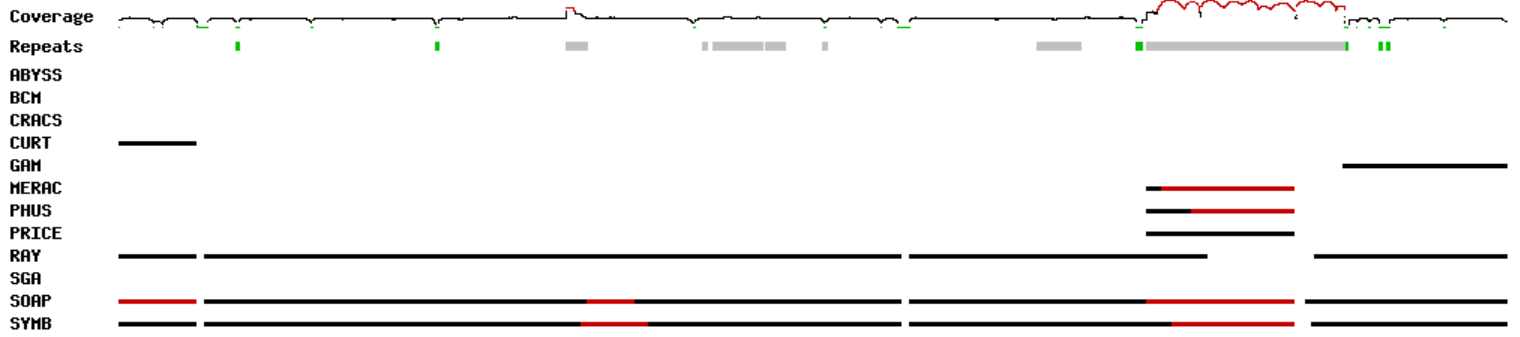

NODE\_11\_length\_1024\_cov\_2085.810547

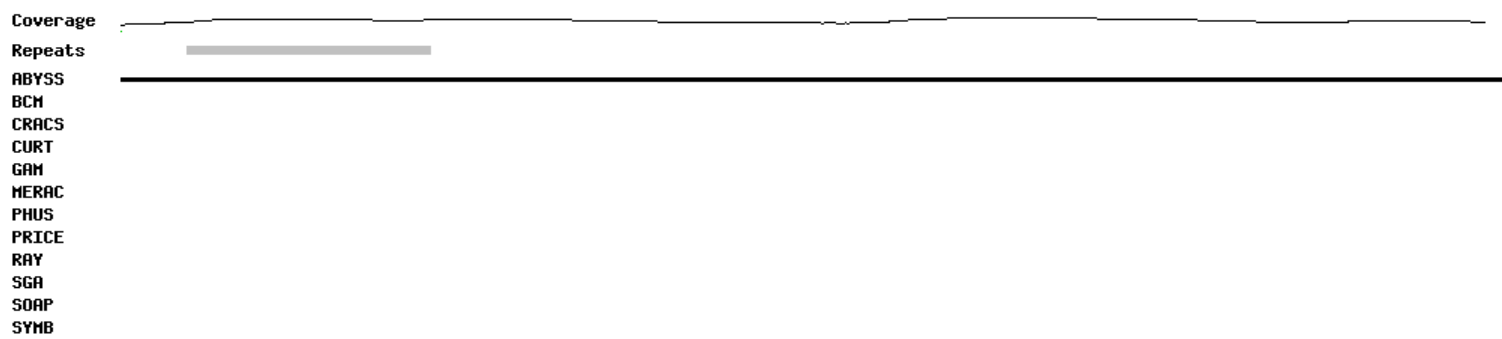

NODE\_12\_length\_39675\_cov\_1355.748901

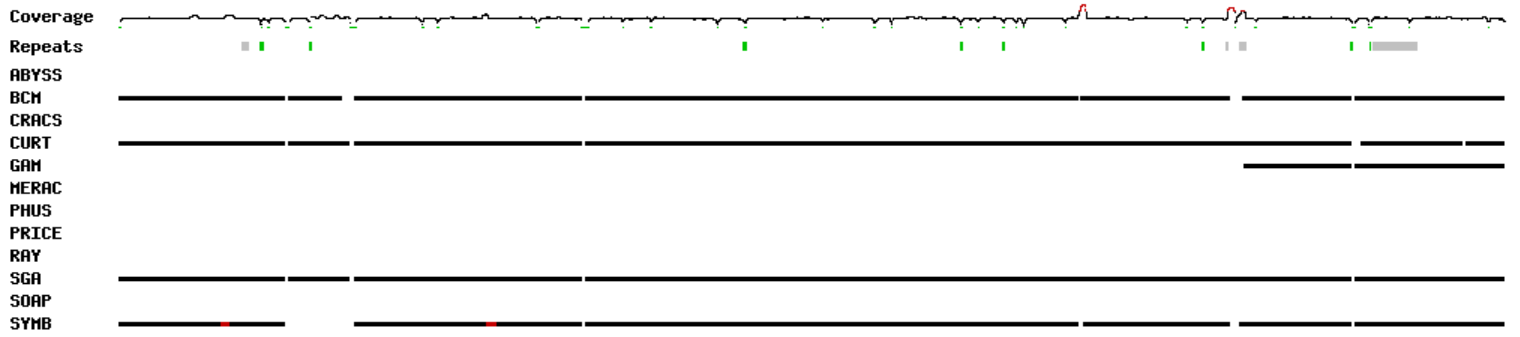

NODE\_13\_length\_6170\_cov\_1093.808960

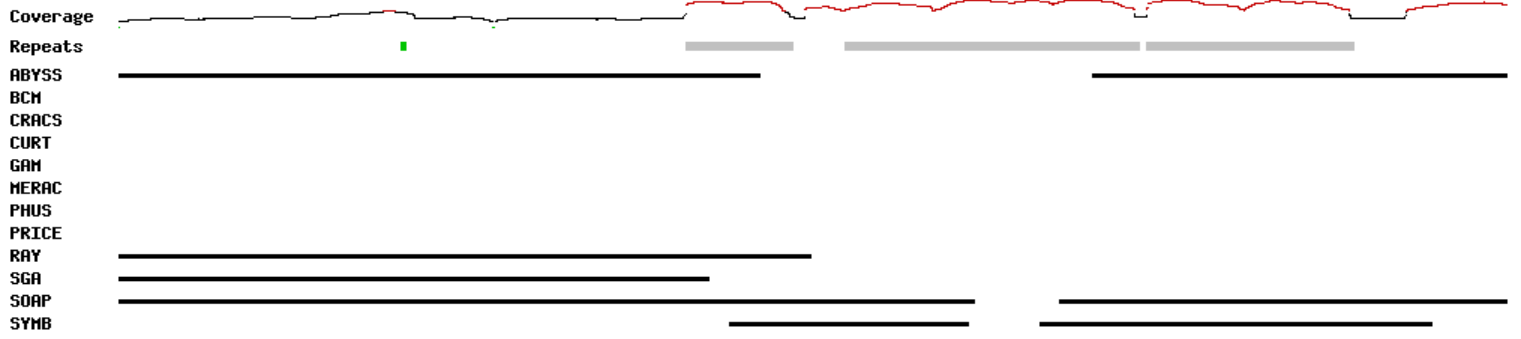

NODE\_14\_length\_10310\_cov\_841,507874

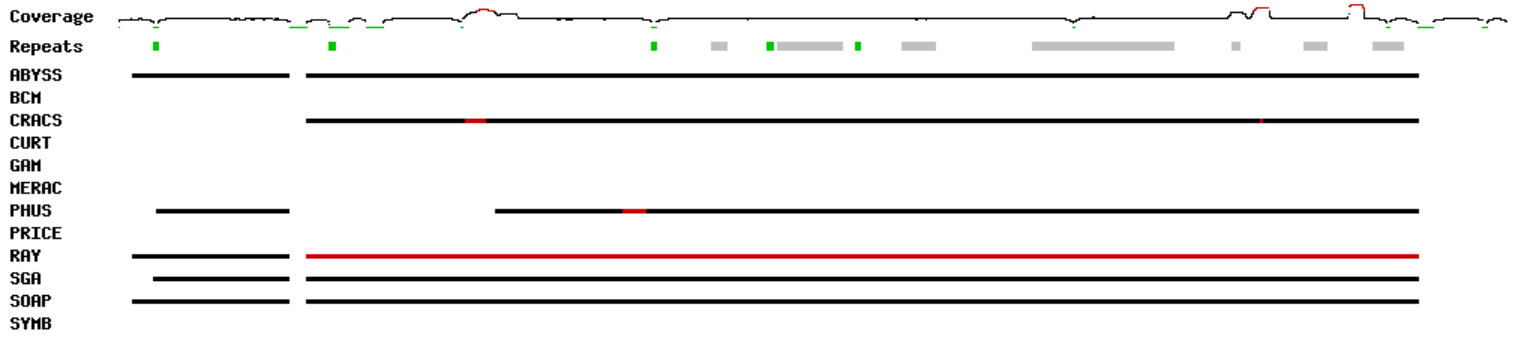

NODE\_18\_length\_19276\_cov\_845.163452

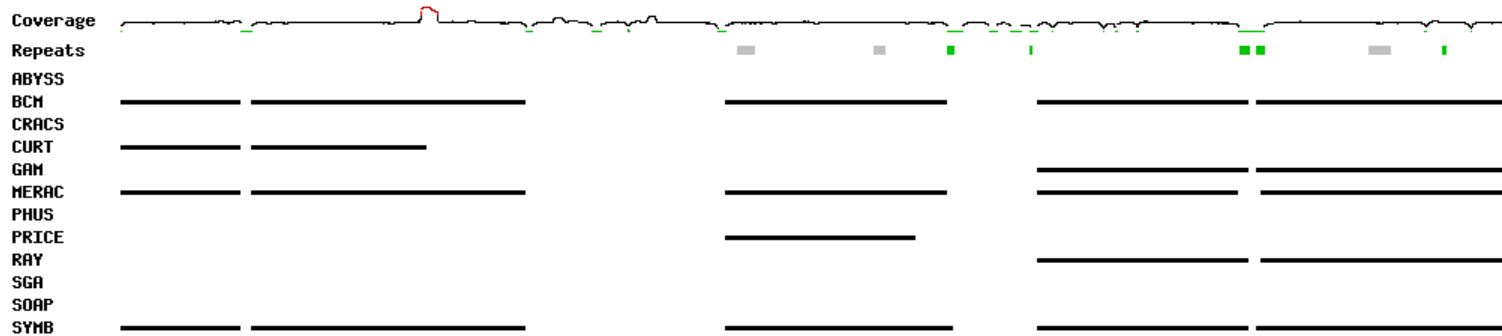

Supplement: 2047-217X-2-10-S8.pdf [file 2047-217X-2-10-S8.pdf]
