# Supplementary material for: Assemblathon 2: evaluating de novo methods of genome assembly in three vertebrate species
Source: Springer Nature journal article supplement (doi:10.1186/2047-217x-2-10), 2013-07-22

# Snake Scaffold Alignment to Optical Map

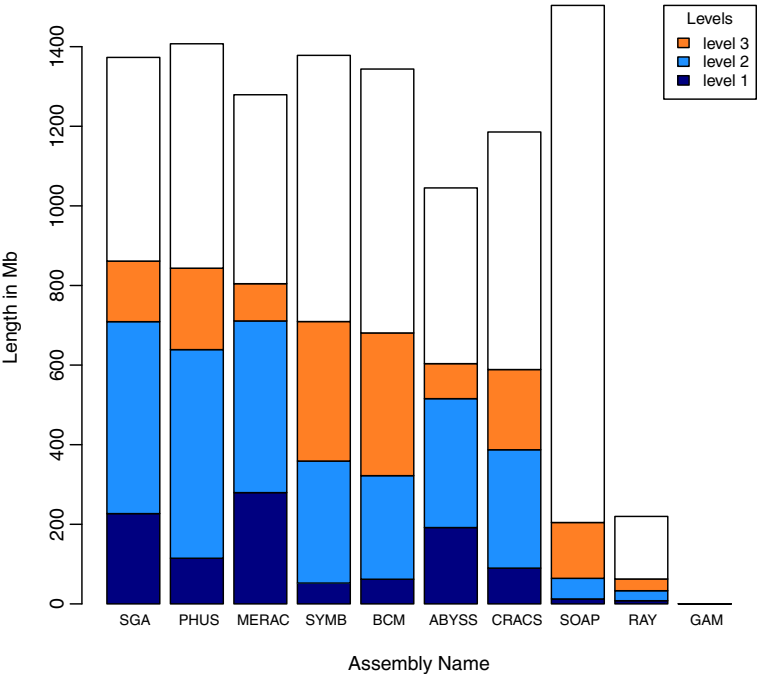

Supplement: 13742_2013_29_MOESM24_ESM.pdf [file 13742_2013_29_MOESM24_ESM.pdf]
